# Supplementary material
Source: MDPI journal article supplement (https://www.mdpi.com/1424-8247/16/3/413)

## Supplementary Information

### **Rapid and efficient access to novel bio-inspired 3-dimensional Tricyclic SpiroLactams as privileged structures via Meyers' lactamization**

**Salia Tangara <sup>1</sup>, Léo Faïon <sup>1</sup>, Catherine Piveteau <sup>1</sup>, Frédéric Capet <sup>2</sup>, Romain Godelier <sup>1</sup>,  
Marion Michel <sup>1</sup>, Marion Flipo <sup>1</sup>, Benoit Deprez <sup>1</sup>, Nicolas Willand <sup>1</sup>, Baptiste Villemagne <sup>1, \*</sup>**

<sup>1</sup> Univ. Lille, Inserm, Institut Pasteur de Lille, U1177 - Drugs and Molecules for Living Systems, F-59000, Lille, France.

<sup>2</sup> Univ. Lille, CNRS, Centrale Lille, ENSCL, Univ. Artois, UMR 8181 - UCCS - Unité de Catalyse et Chimie du Solide, F-59000 Lille, France.

\*Correspondence: [baptiste.villemagne@univ-lille.fr](mailto:baptiste.villemagne@univ-lille.fr);

**$^1\text{H}$  and  $^{13}\text{C}$  NMR Spectra:**

**16,  $^1\text{H}$  NMR (300 MHz,  $\text{CDCl}_3$ )**

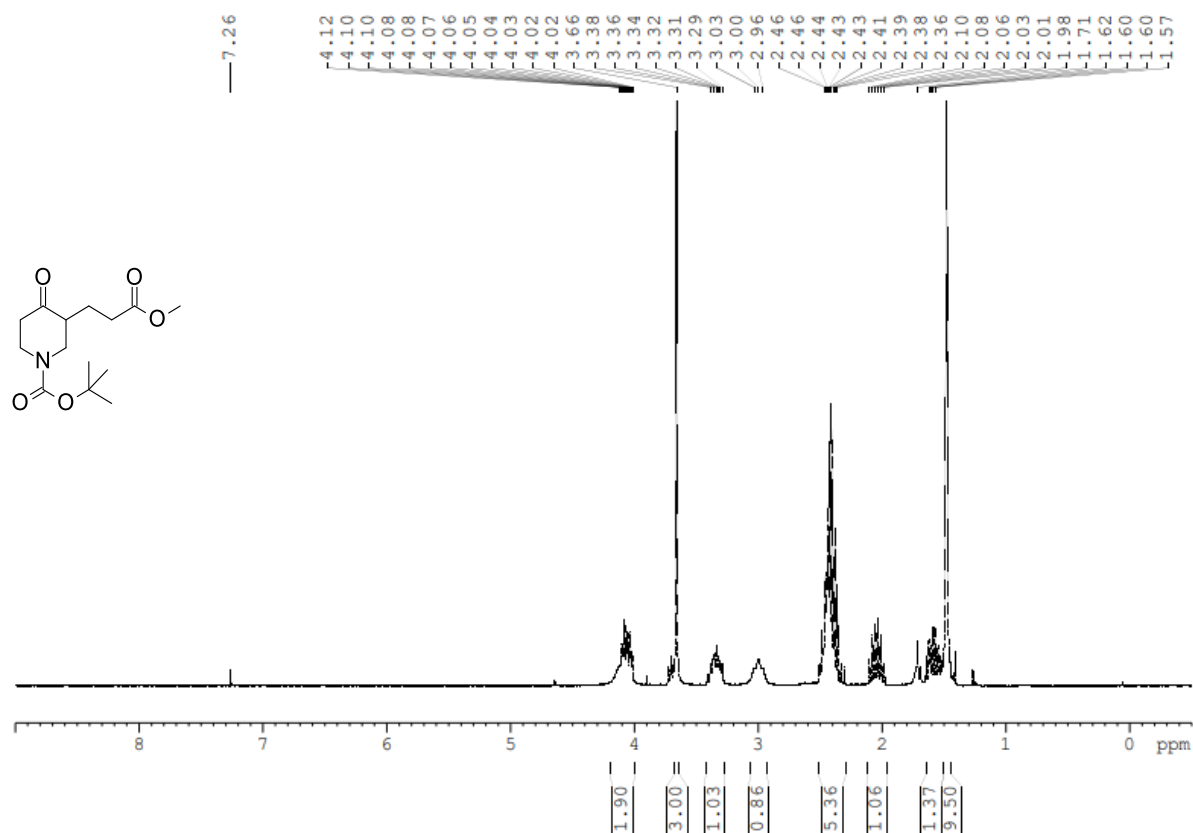

**16,  $^{13}\text{C}$  NMR (75 MHz,  $\text{CDCl}_3$ )**

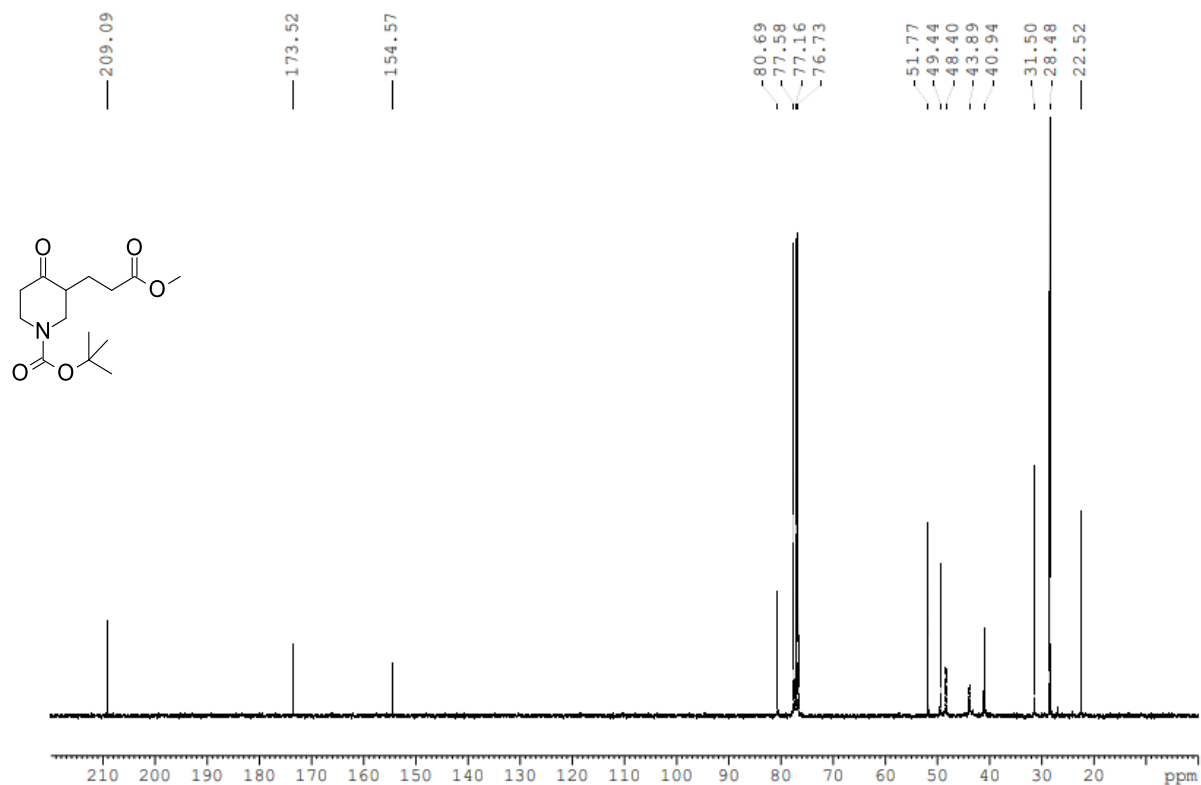

**30**,  $^1\text{H}$  NMR (300 MHz,  $\text{CDCl}_3$ )

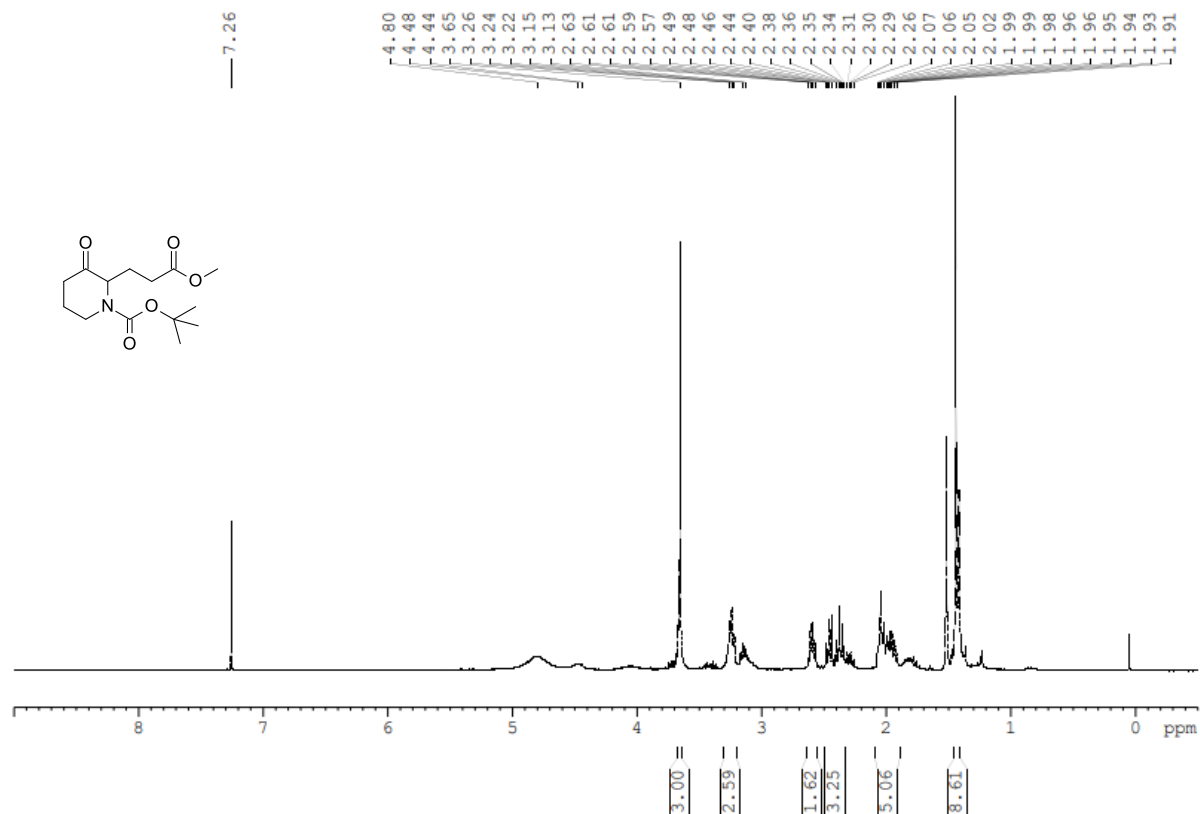

**32**,  $^1\text{H}$  NMR (300 MHz,  $\text{CDCl}_3$ )

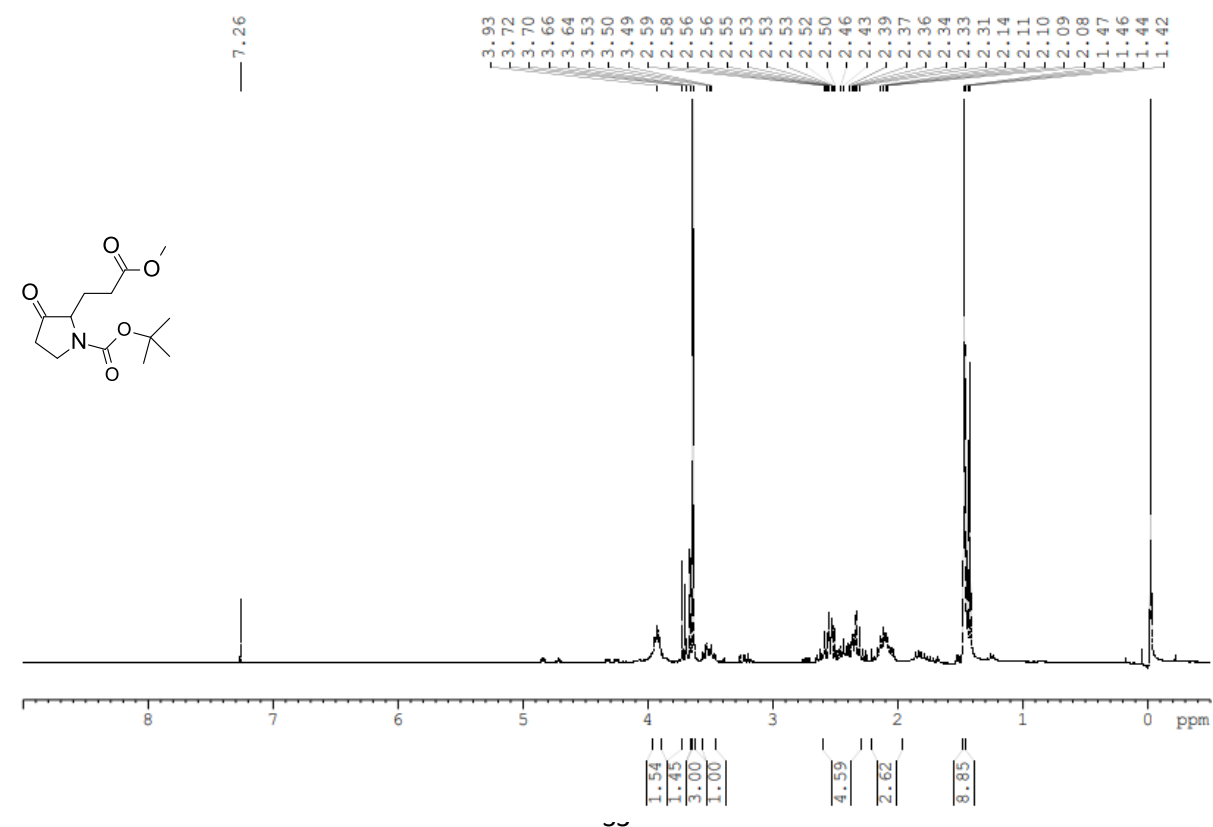

**34**,  $^1\text{H}$  NMR (300 MHz,  $\text{CDCl}_3$ )

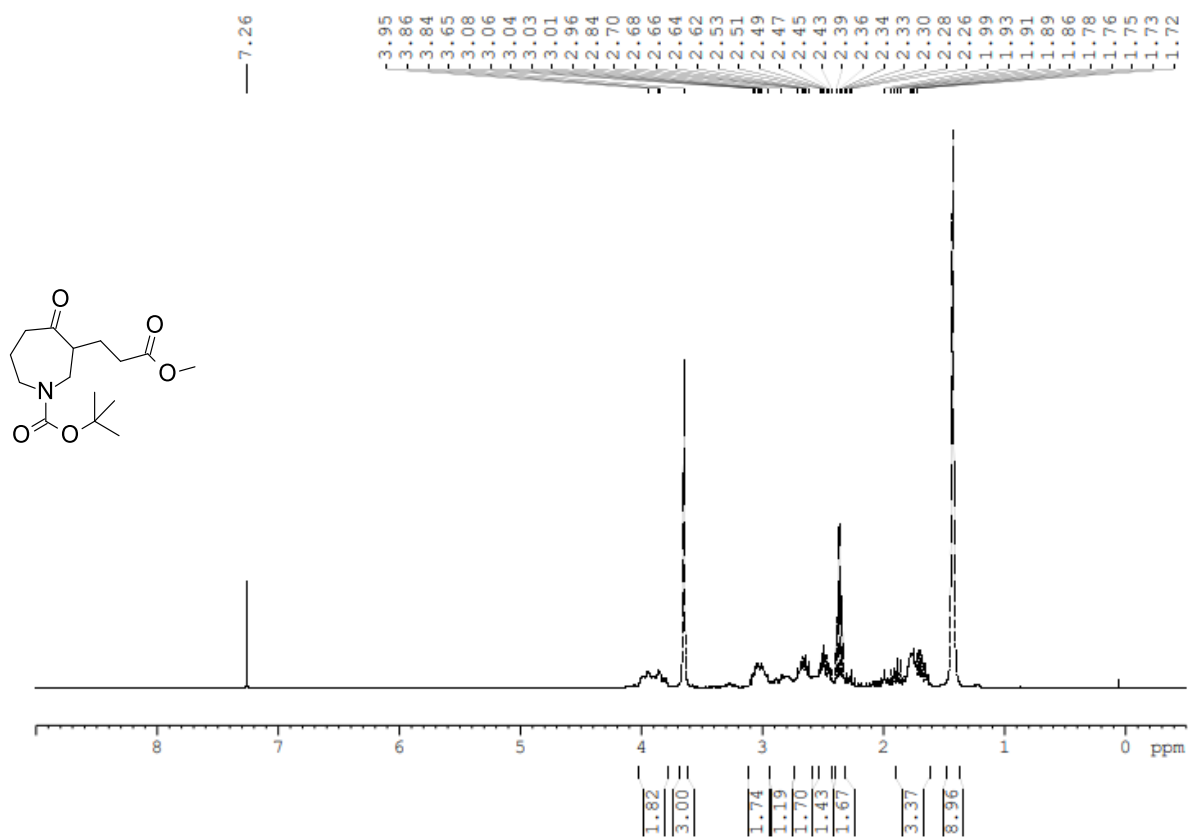

**34**,  $^{13}\text{C}$  NMR (75 MHz,  $\text{CDCl}_3$ )

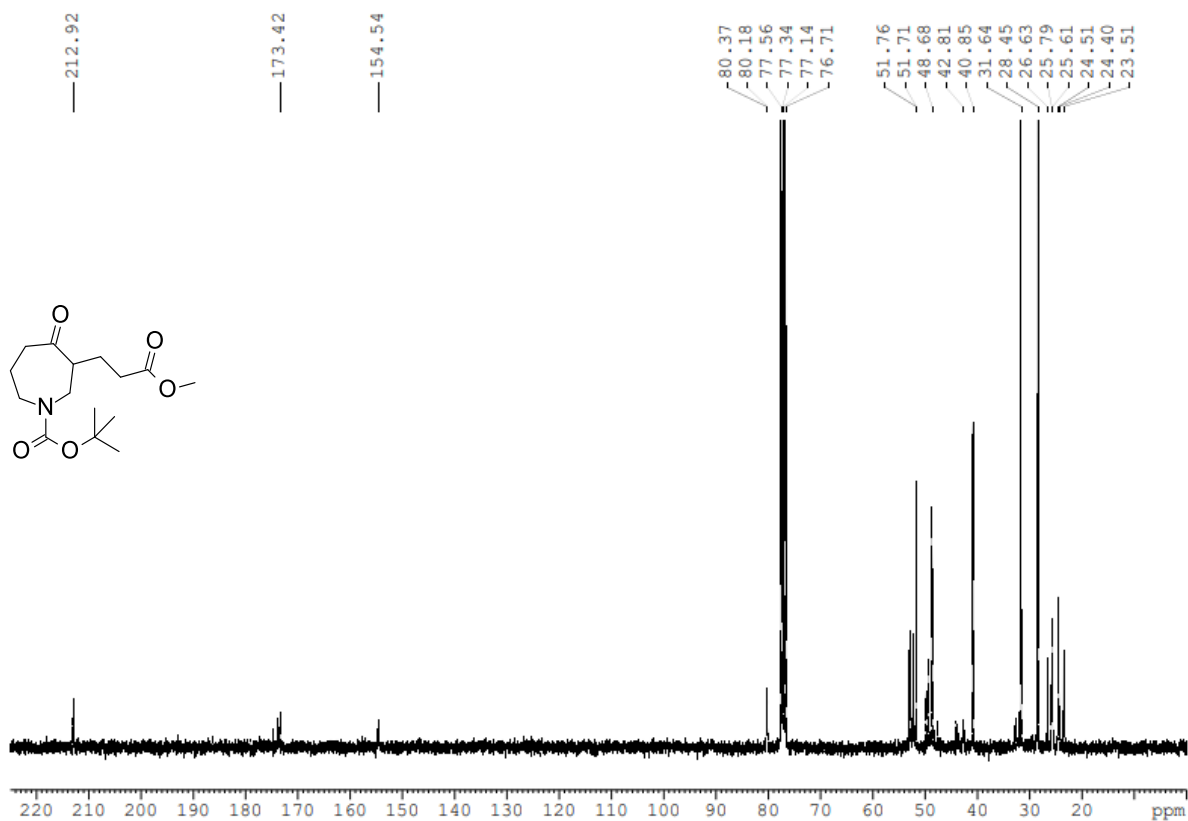

**36**,  $^1\text{H}$  NMR (300 MHz,  $\text{CDCl}_3$ )

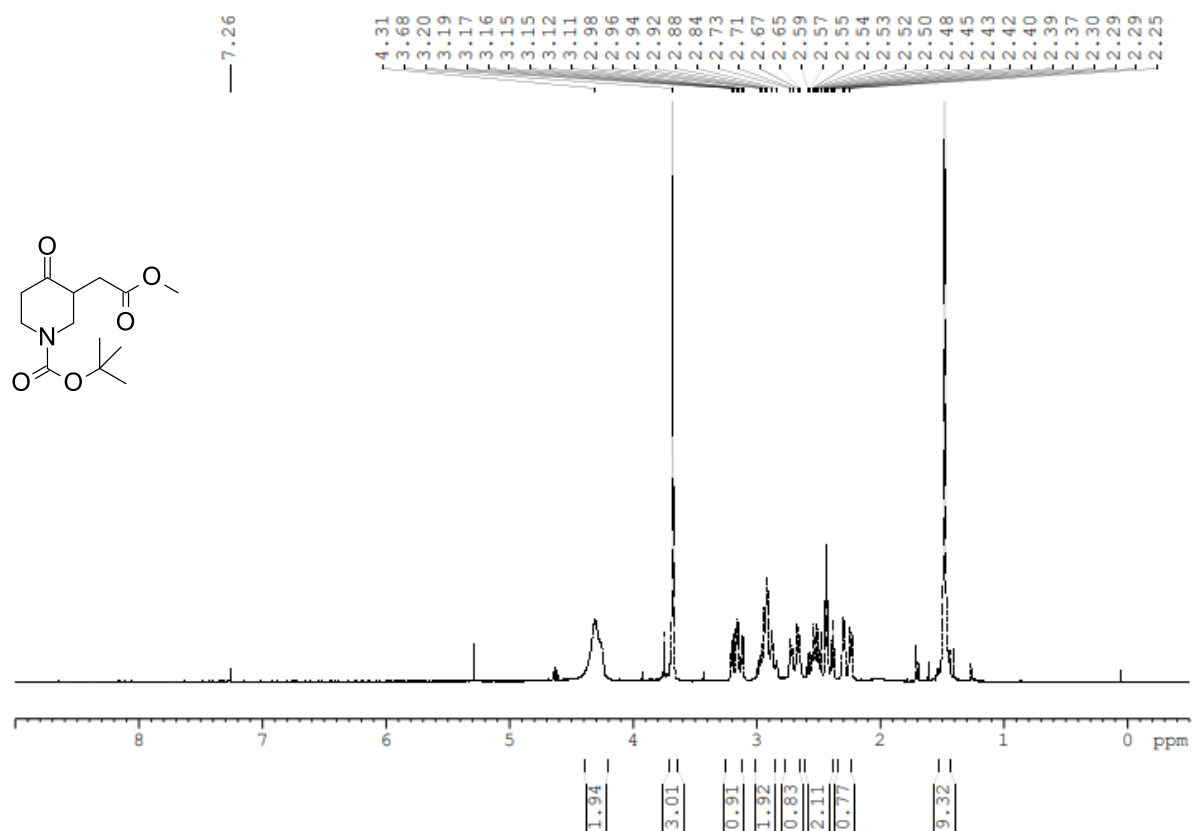

**36**,  $^{13}\text{C}$  NMR (75 MHz,  $\text{CDCl}_3$ )

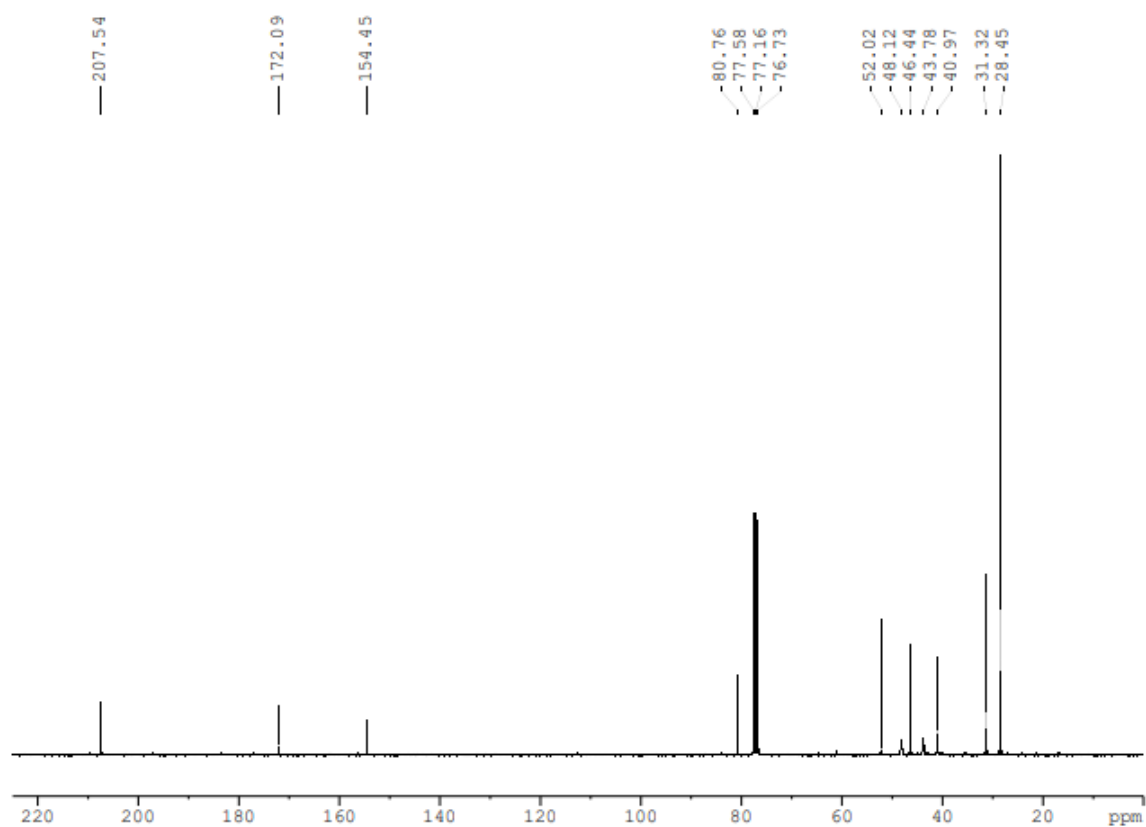

**38**,  $^1\text{H}$  NMR (300 MHz,  $\text{CDCl}_3$ )

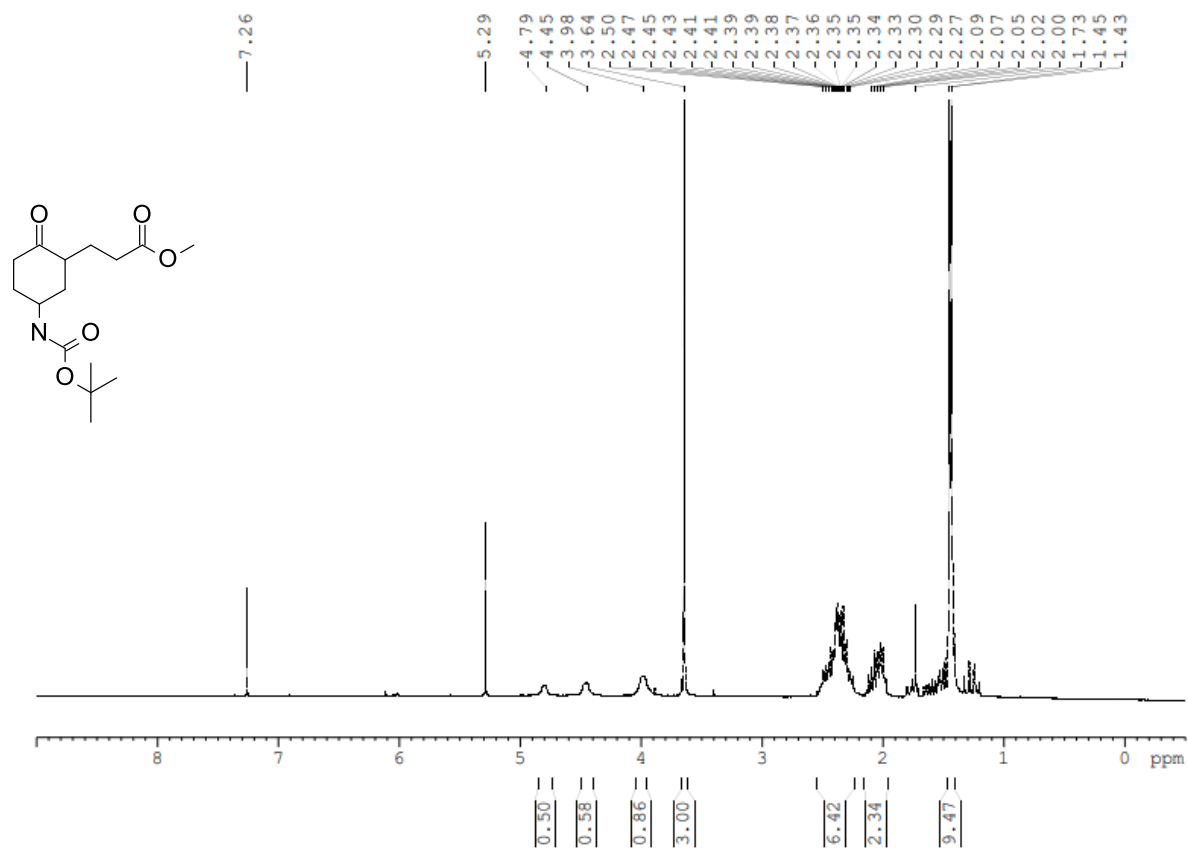

**11**,  $^1\text{H}$  NMR (300 MHz,  $\text{CD}_2\text{Cl}_2$ )

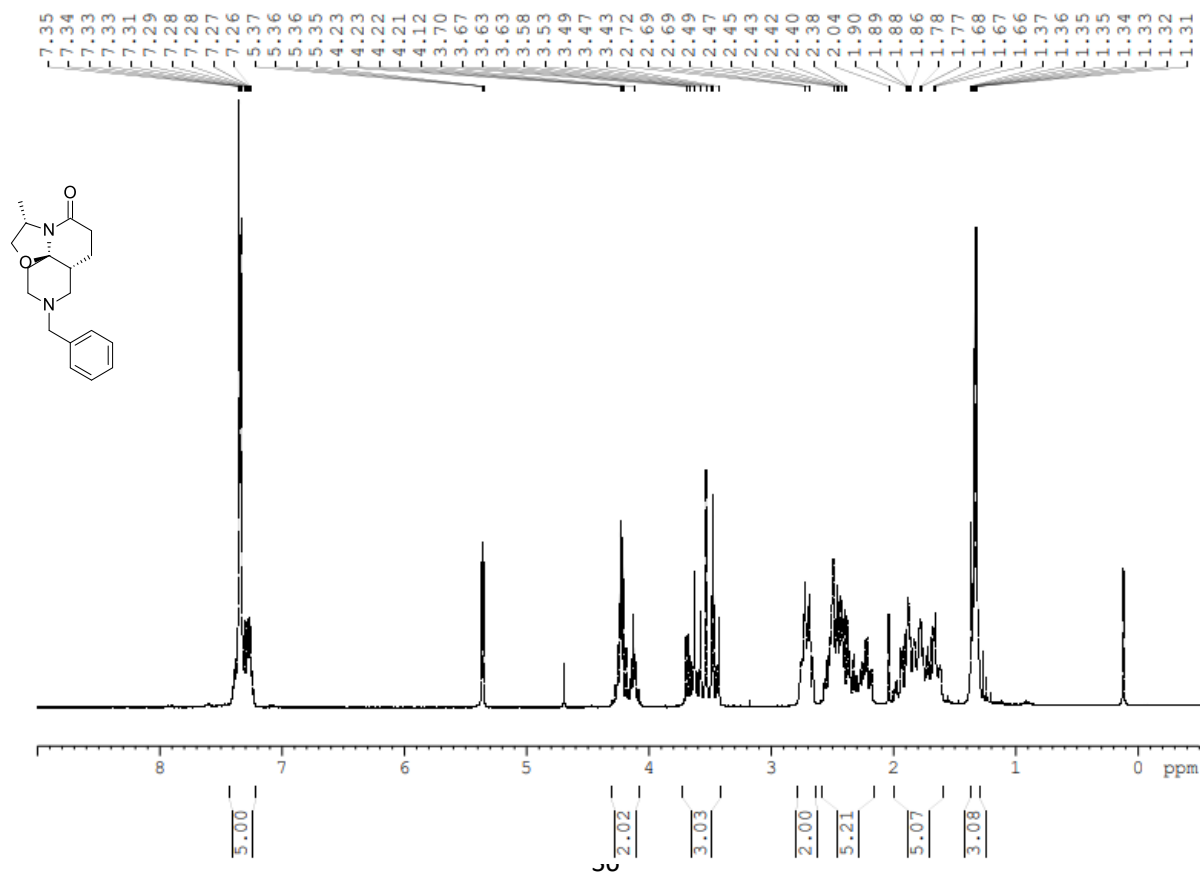

**11**,  $^{13}\text{C}$  NMR (75 MHz,  $\text{CD}_2\text{Cl}_2$ )

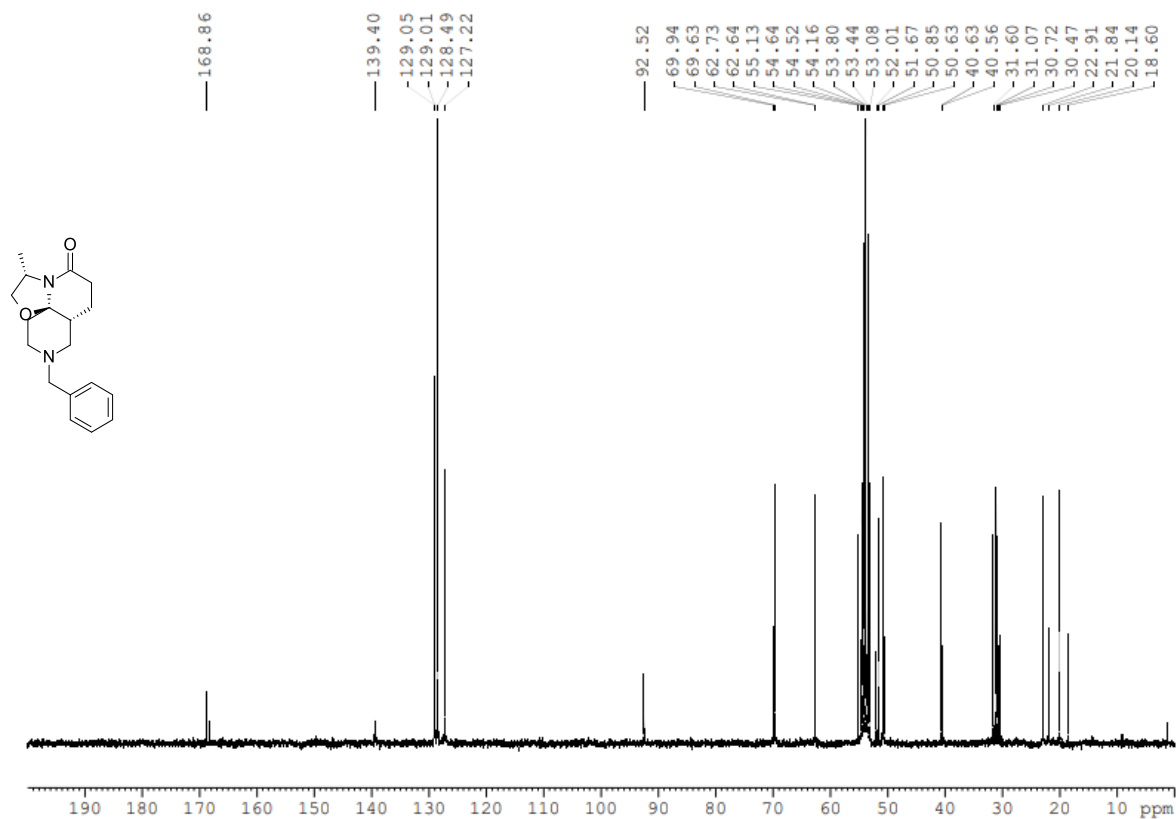

**12**,  $^1\text{H}$  NMR (300 MHz,  $\text{CDCl}_3$ )

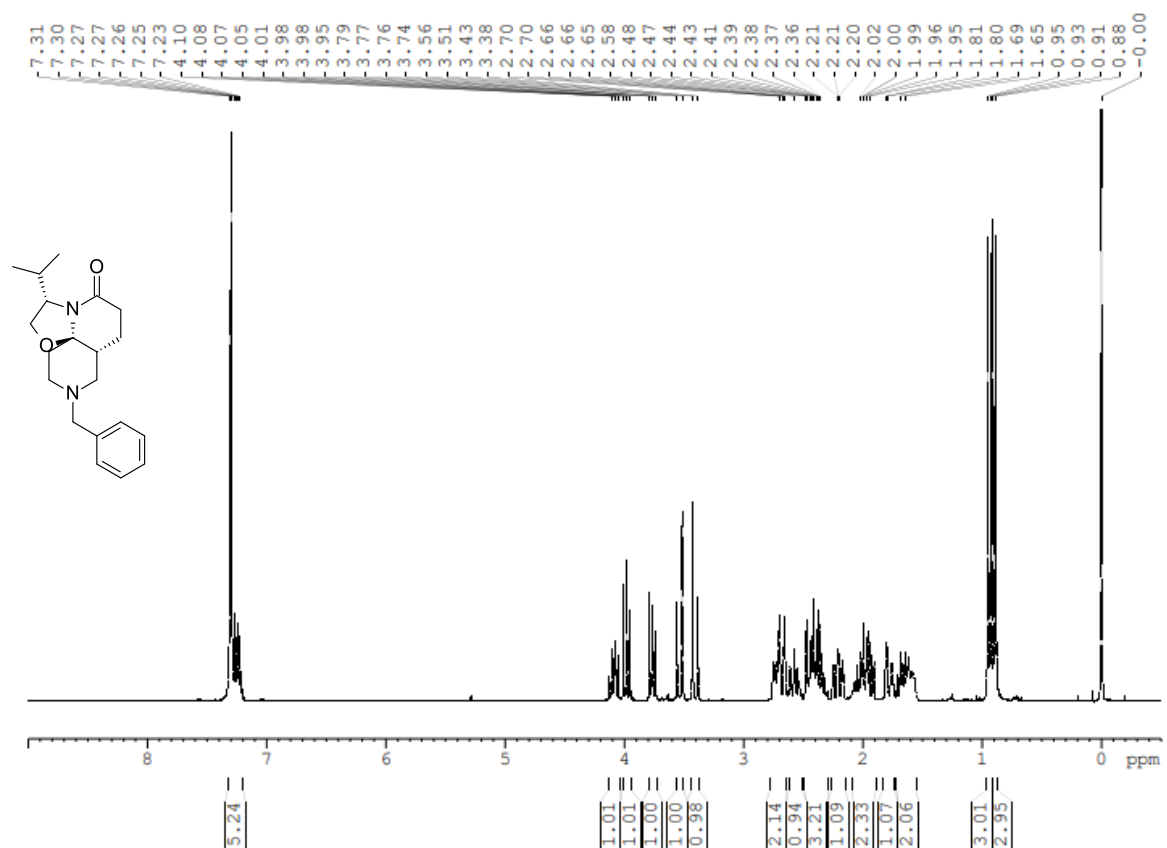

**12**,  $^{13}\text{C}$  NMR (75 MHz,  $\text{CDCl}_3$ )

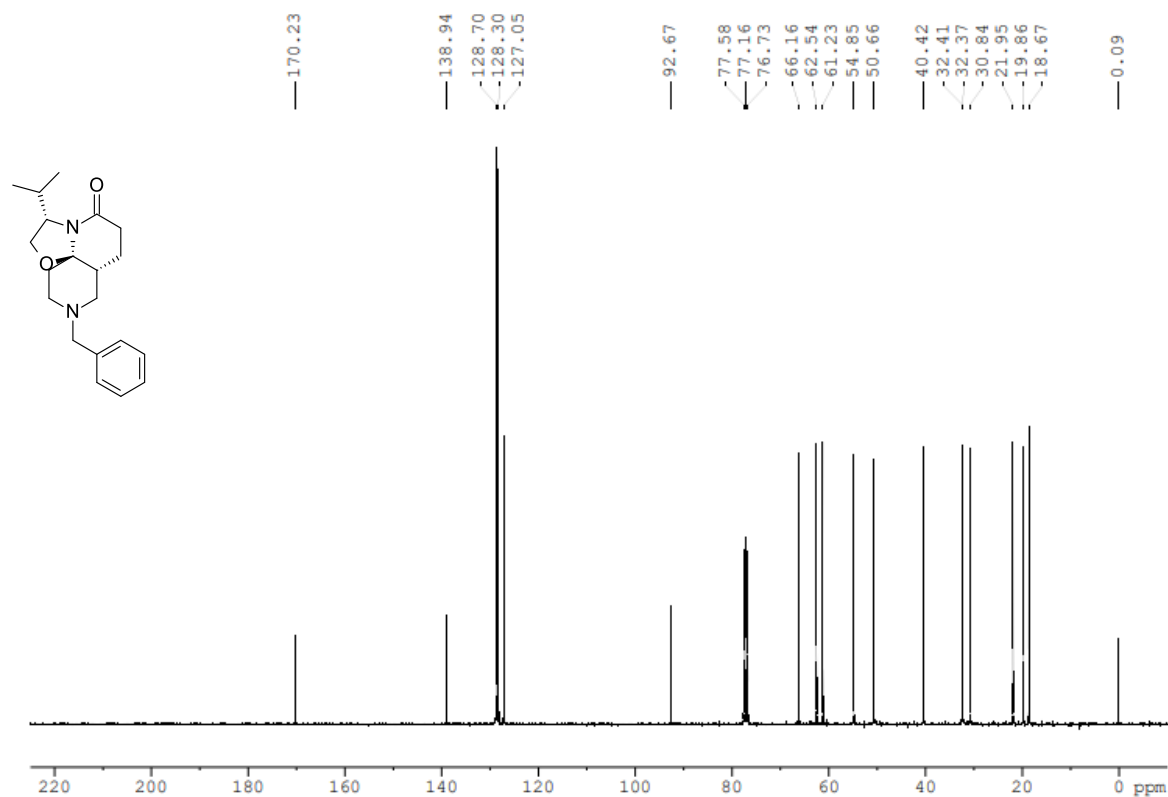

**13**,  $^1\text{H}$  NMR (300 MHz,  $\text{CD}_2\text{Cl}_2$ )

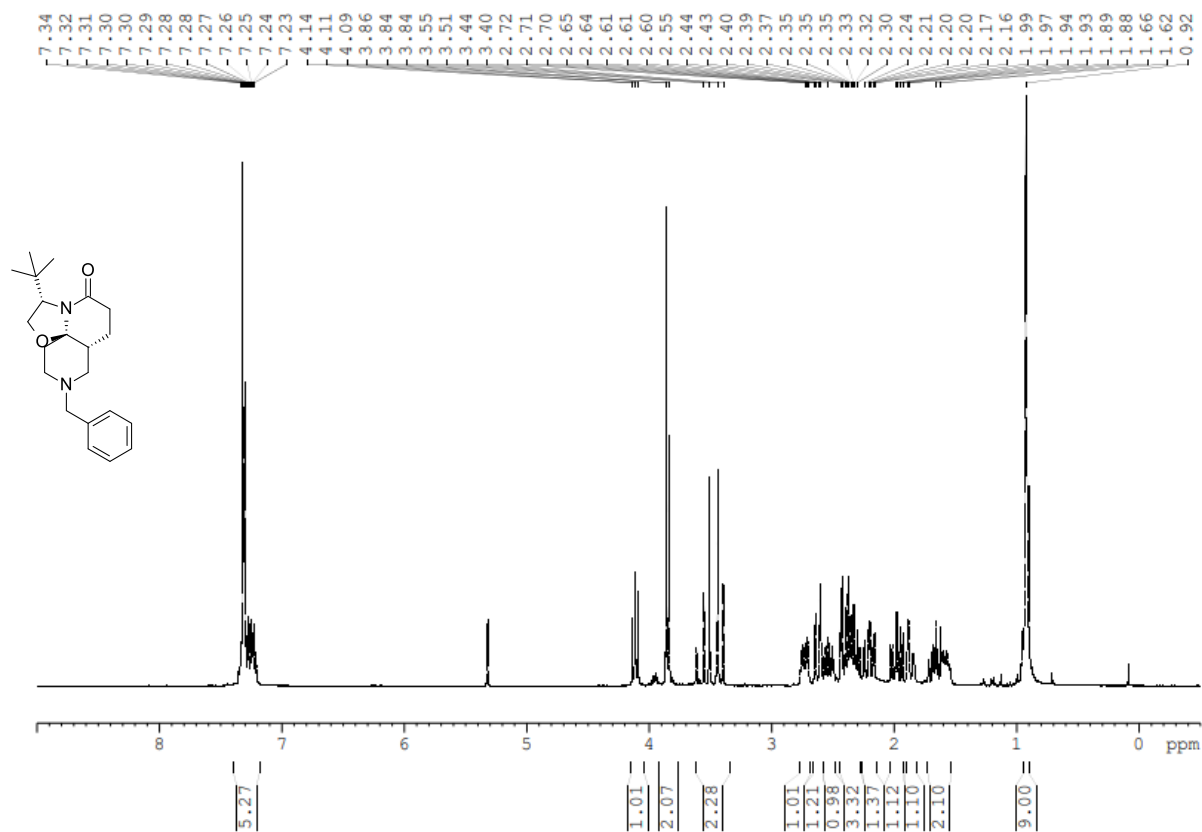



**13,**  $^{13}\text{C}$  NMR (75 MHz,  $\text{CD}_2\text{Cl}_2$ )

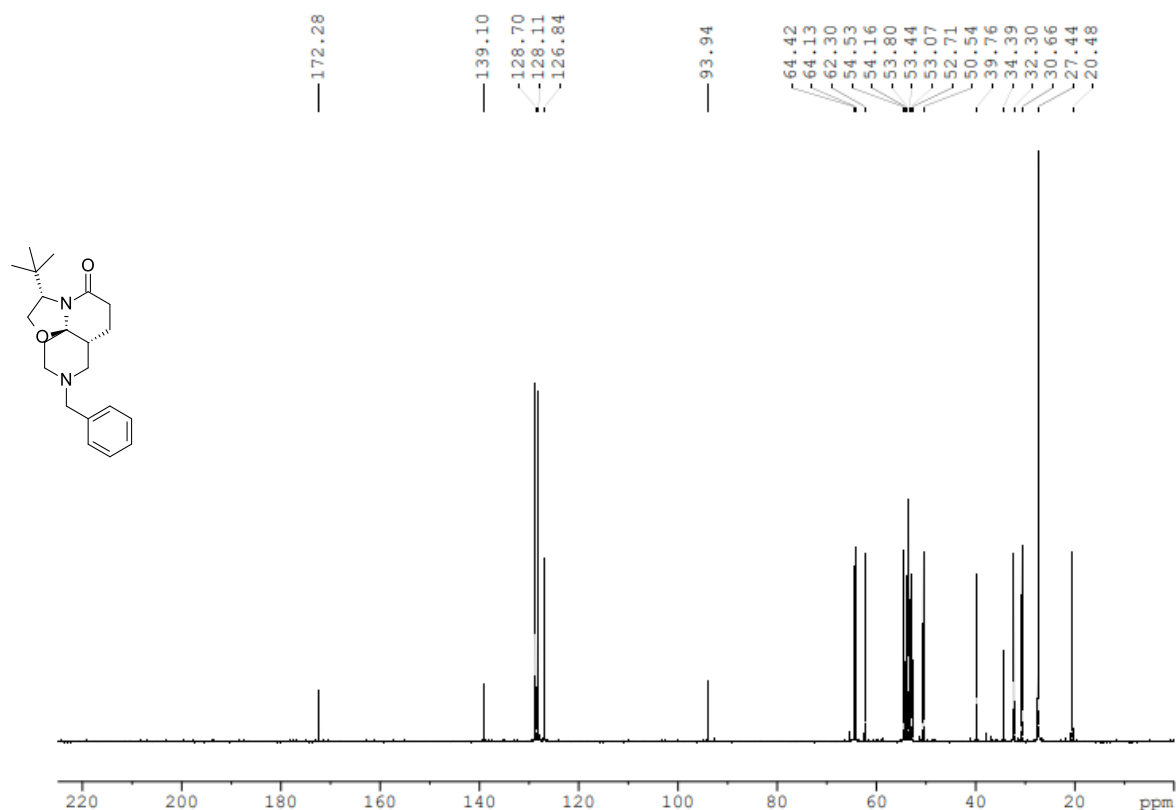

**17,**  $^1\text{H}$  NMR (300 MHz,  $\text{CDCl}_3$ )

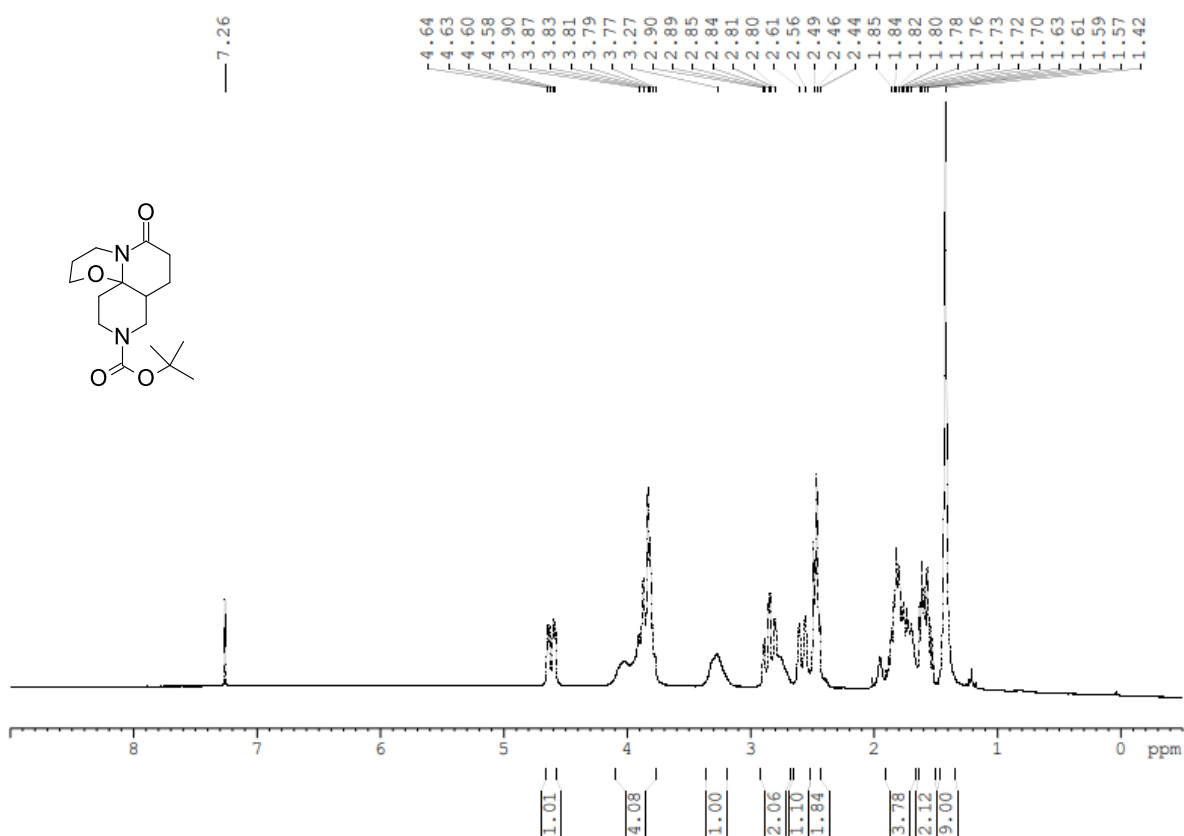

**17**,  $^{13}\text{C}$  NMR (75 MHz,  $\text{CDCl}_3$ )

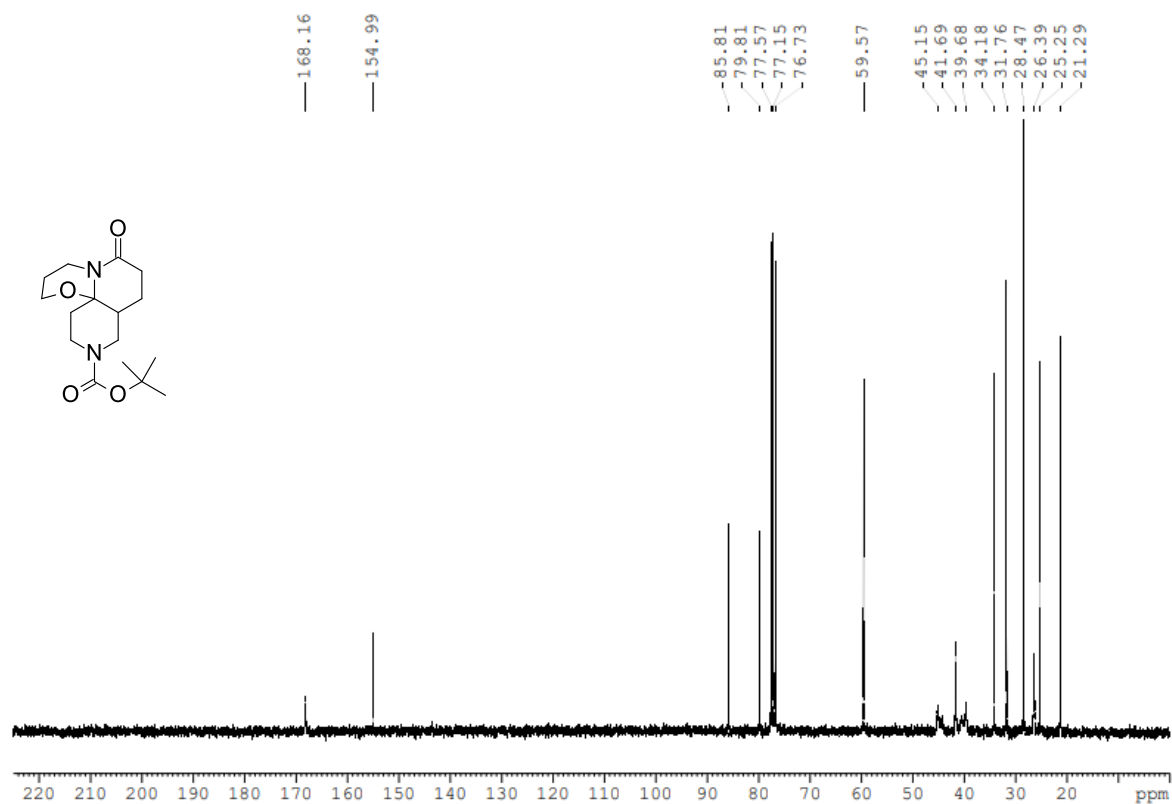

**18**,  $^1\text{H}$  NMR (300 MHz,  $\text{CDCl}_3$ )

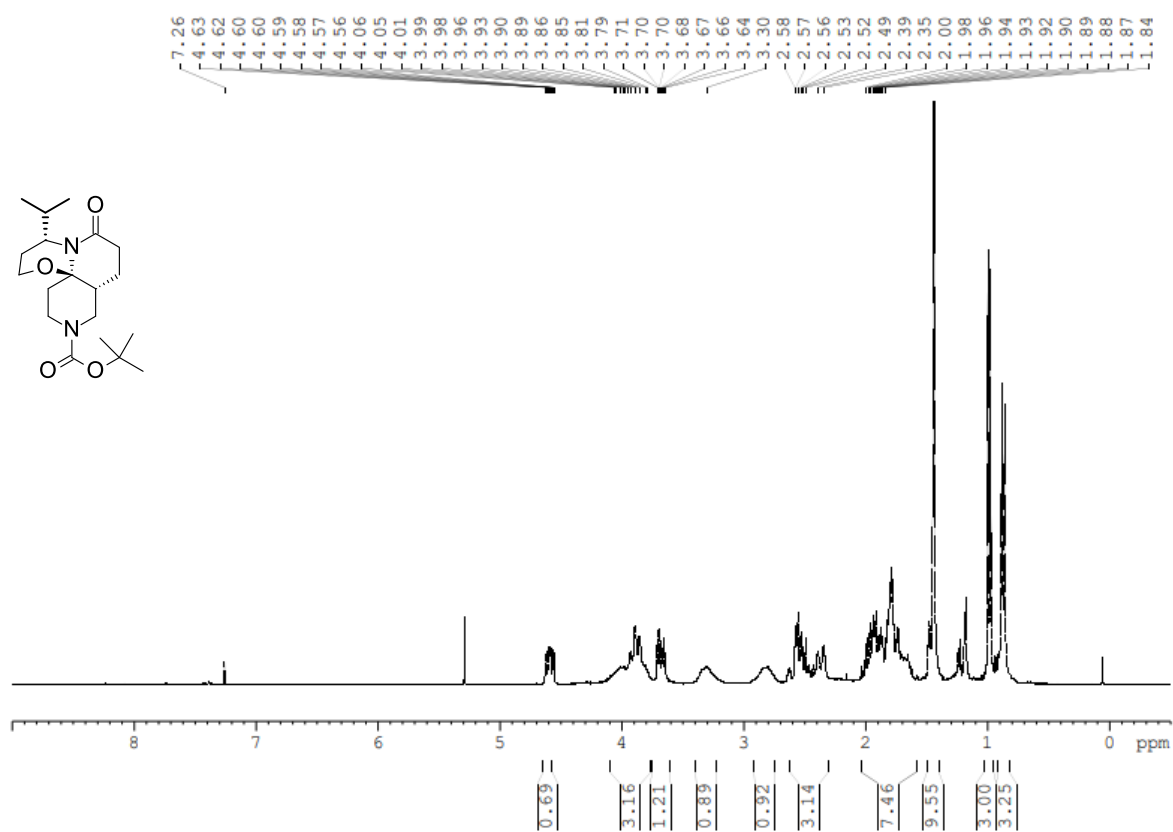

**18**,  $^{13}\text{C}$  NMR (75 MHz,  $\text{CDCl}_3$ )

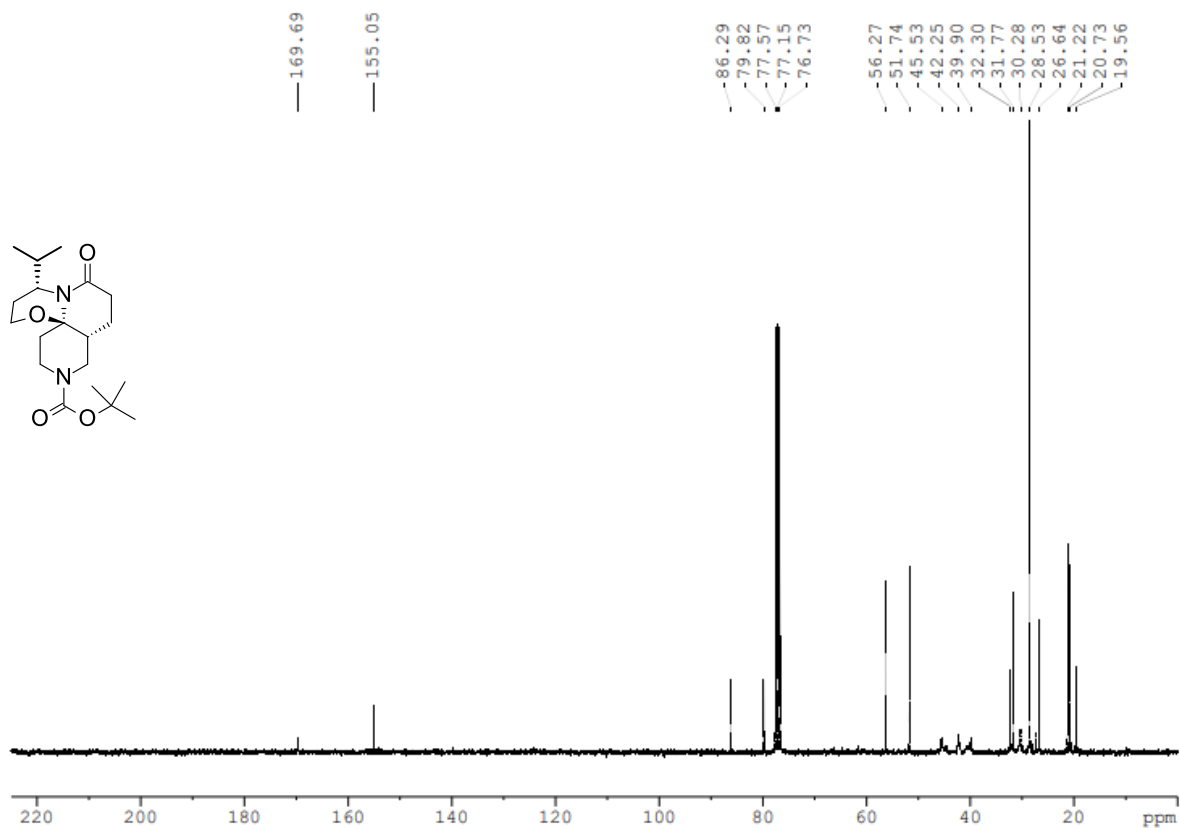

**19+19'**,  $^1\text{H}$  NMR (300 MHz,  $\text{CDCl}_3$ )

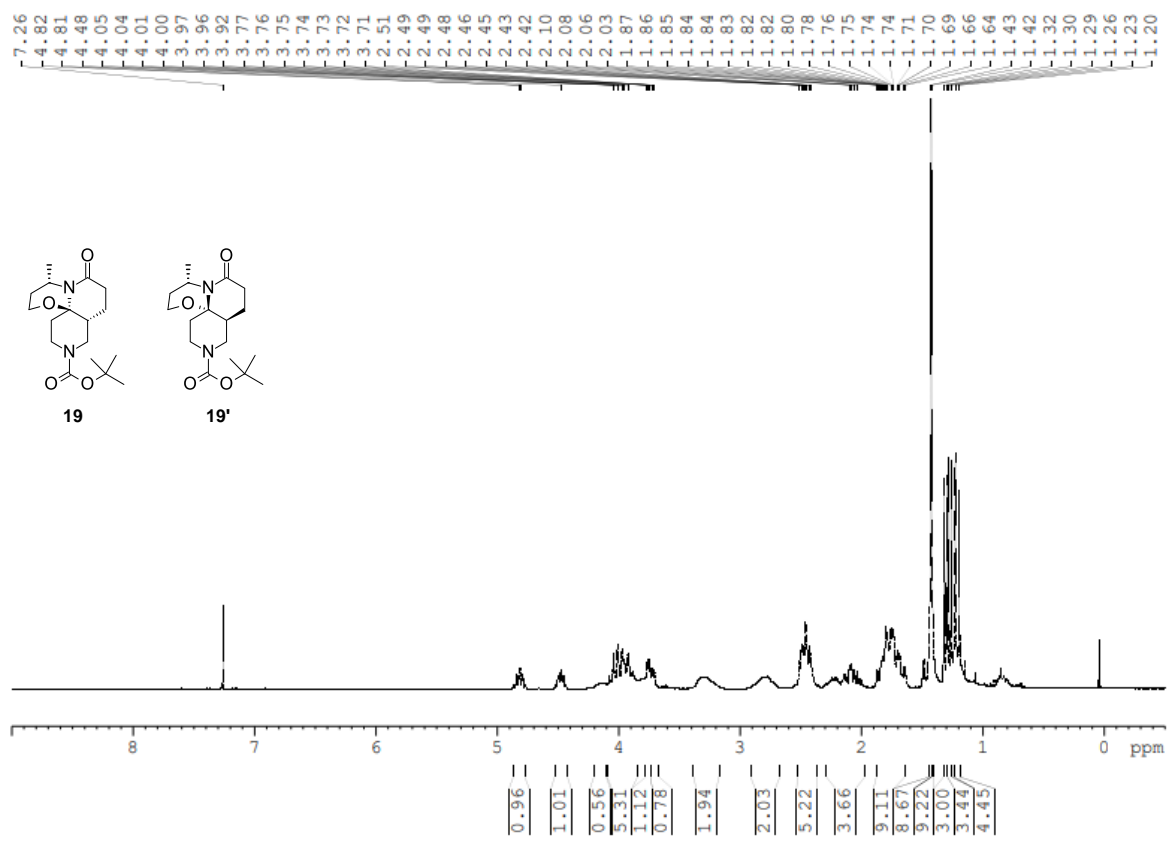

**19+19'**,  $^{13}\text{C}$  NMR (75 MHz,  $\text{CDCl}_3$ )

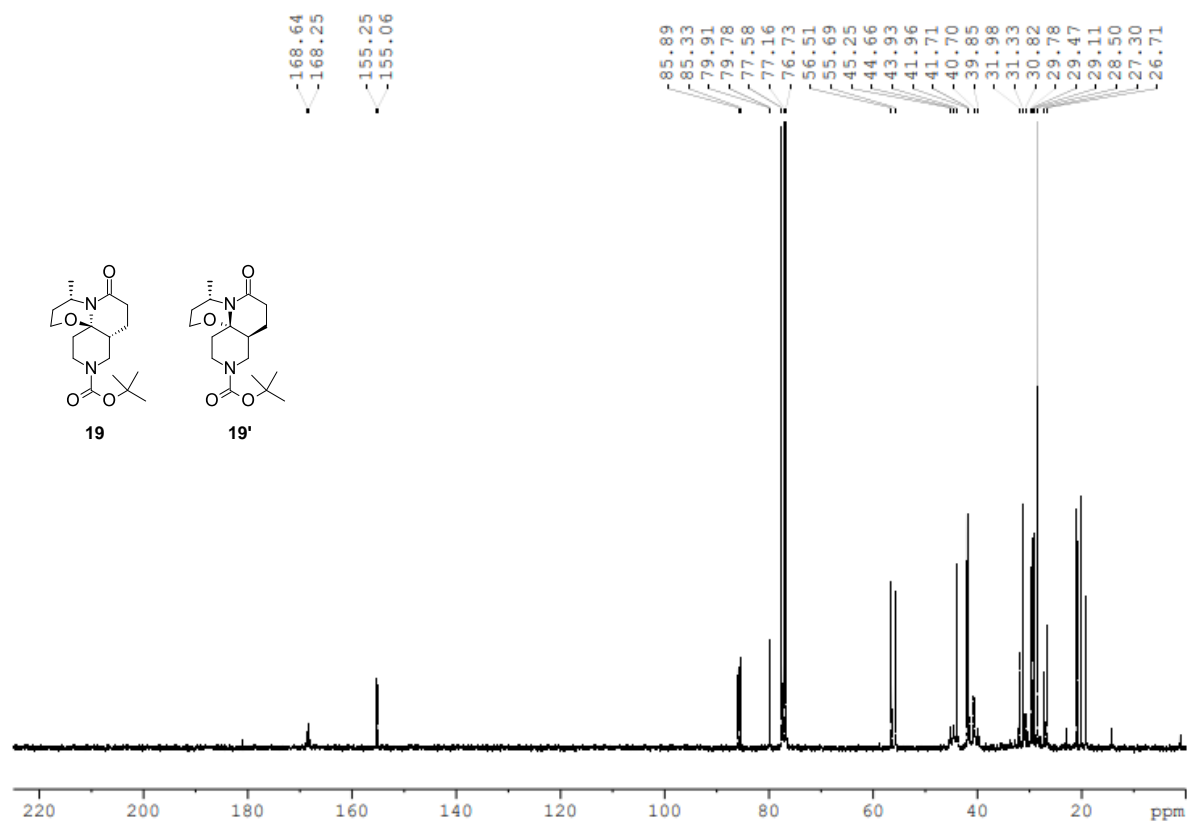

**20**,  $^1\text{H}$  NMR (300 MHz,  $\text{CDCl}_3$ )

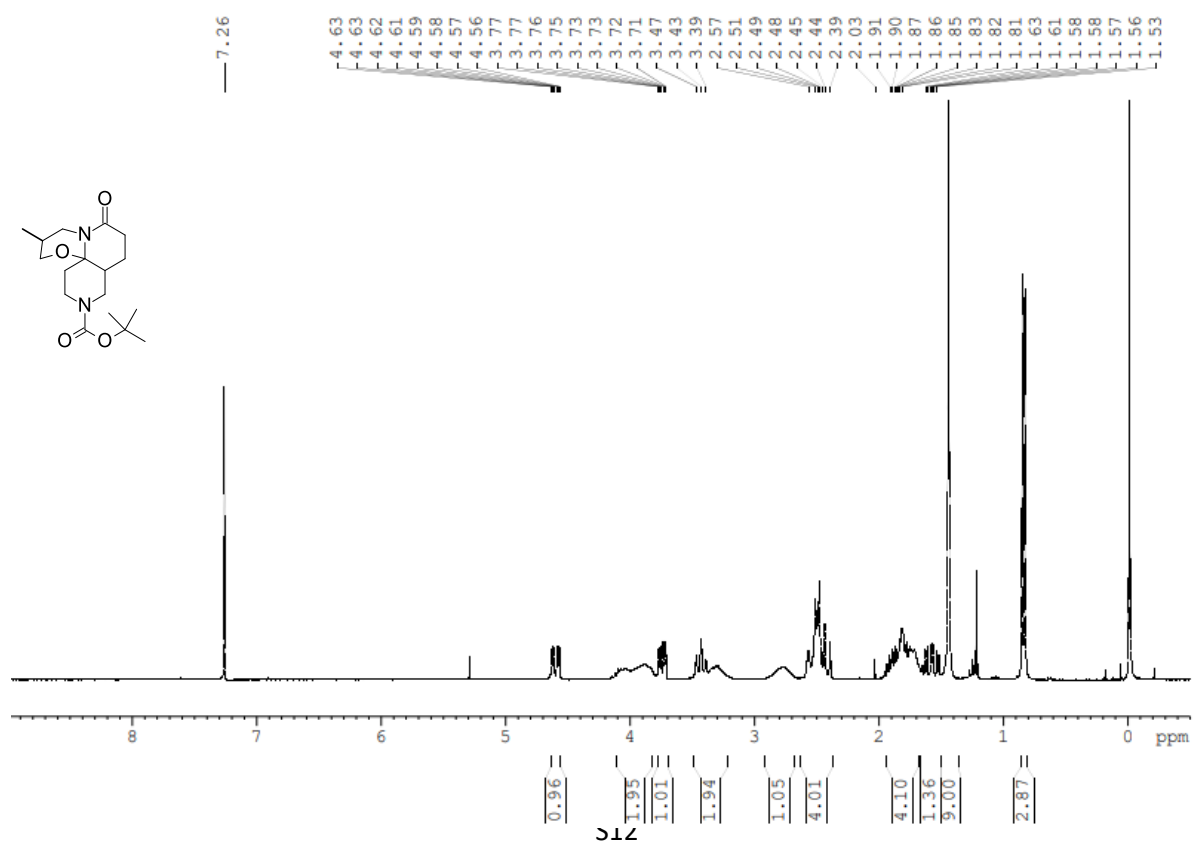

**20**,  $^{13}\text{C}$  NMR (75 MHz,  $\text{CDCl}_3$ )

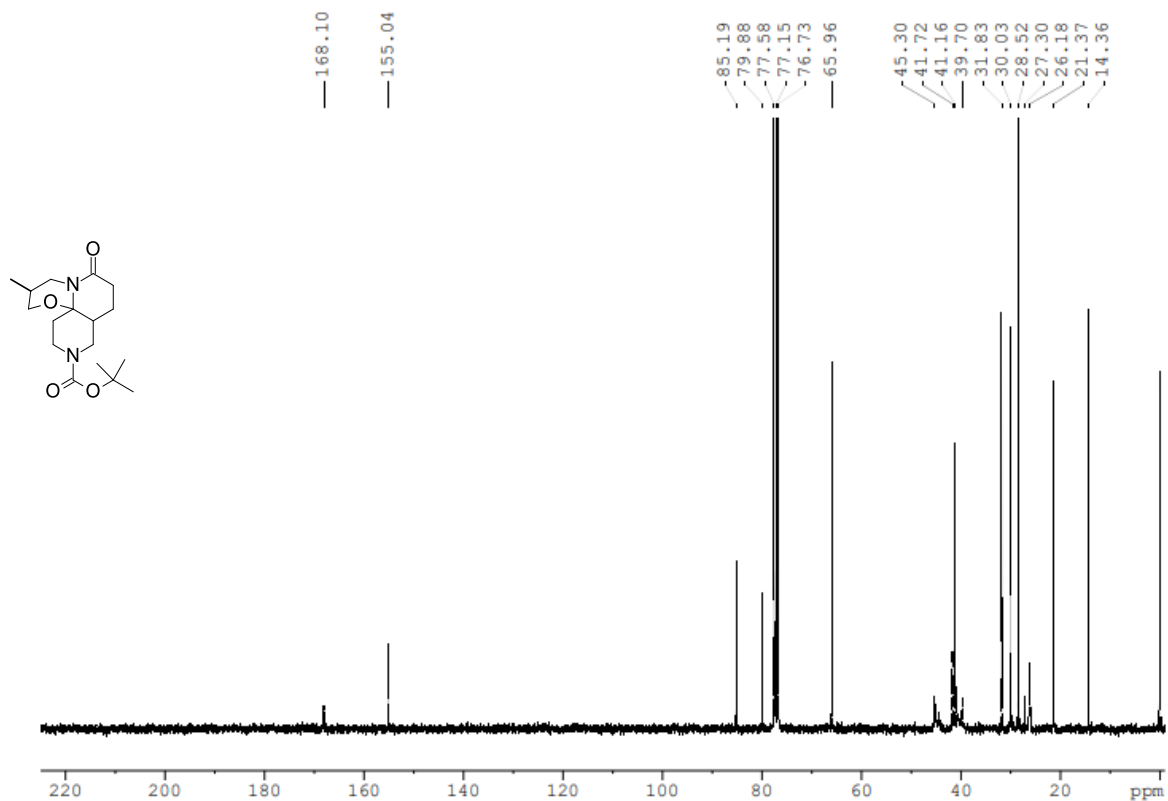

**21**,  $^1\text{H}$  NMR (300 MHz,  $\text{CDCl}_3$ )

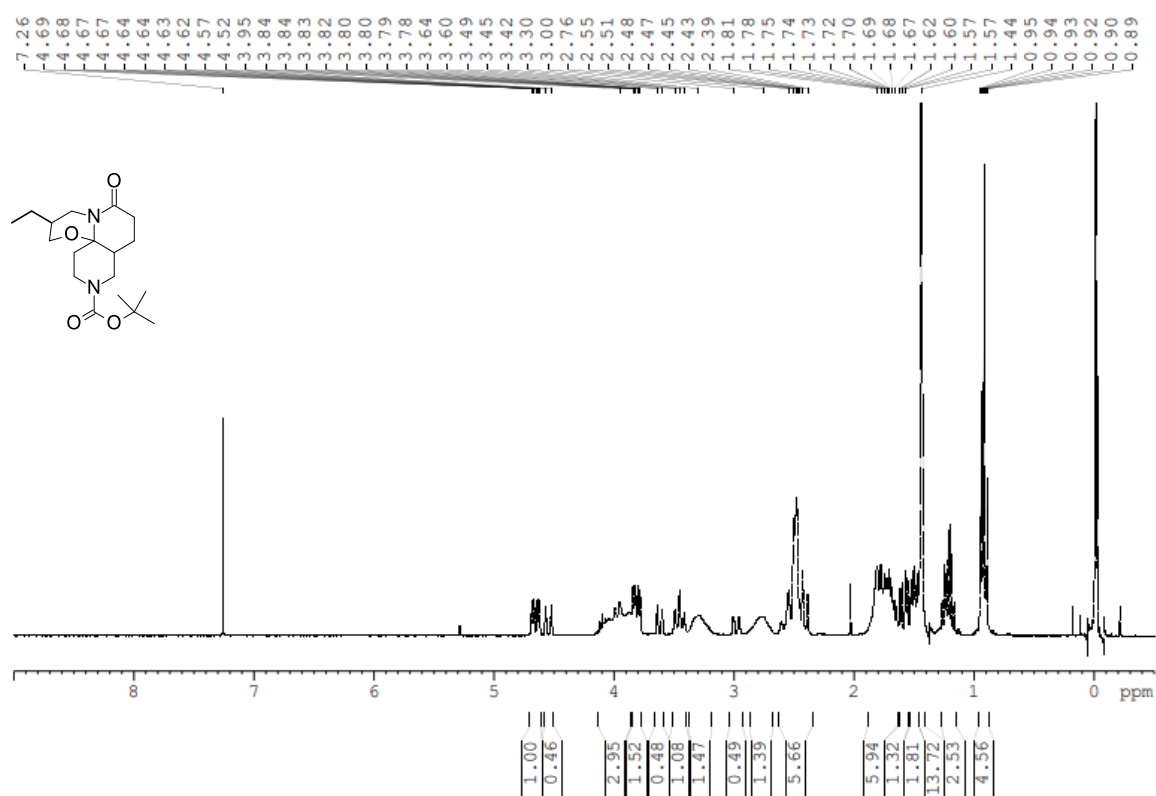

**21**,  $^{13}\text{C}$  NMR (75 MHz,  $\text{CDCl}_3$ )

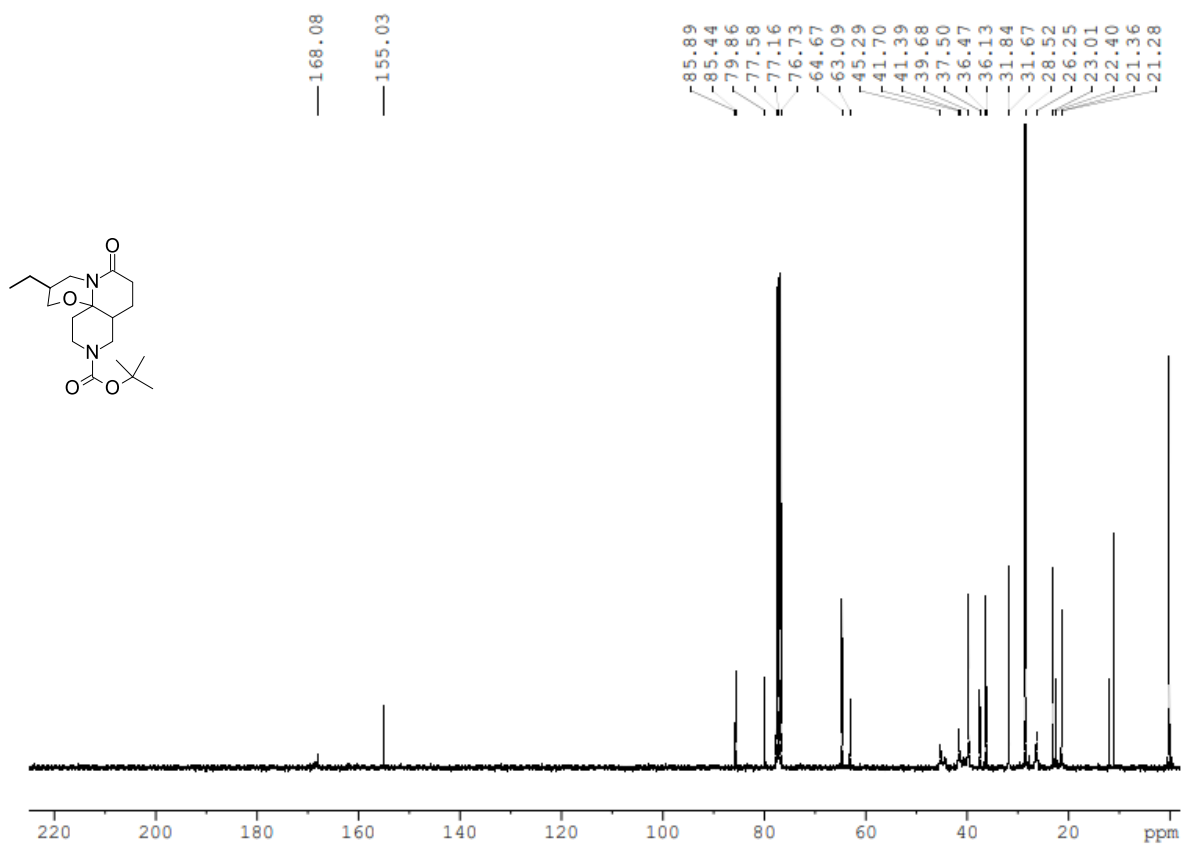

**22**,  $^1\text{H}$  NMR (300 MHz,  $\text{CDCl}_3$ )

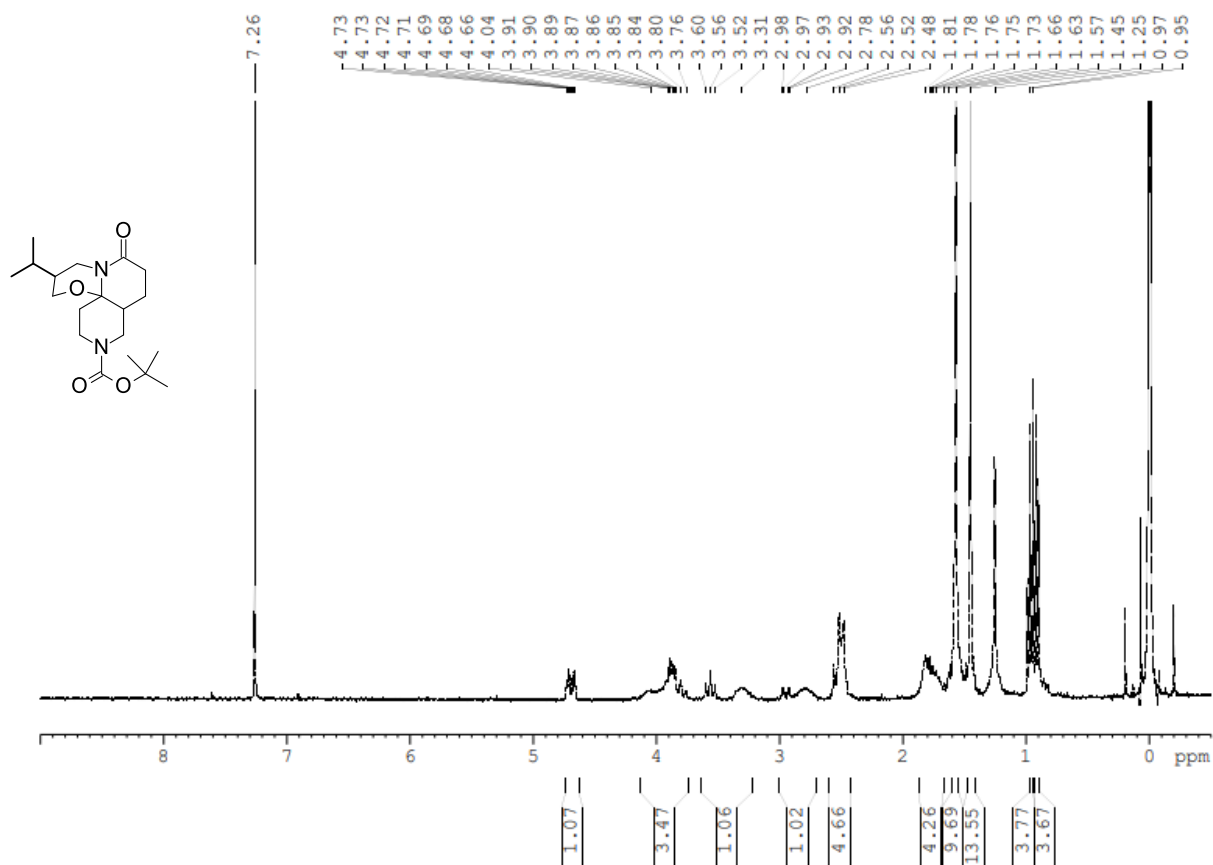

**22**,  $^{13}\text{C}$  NMR (75 MHz,  $\text{CDCl}_3$ )

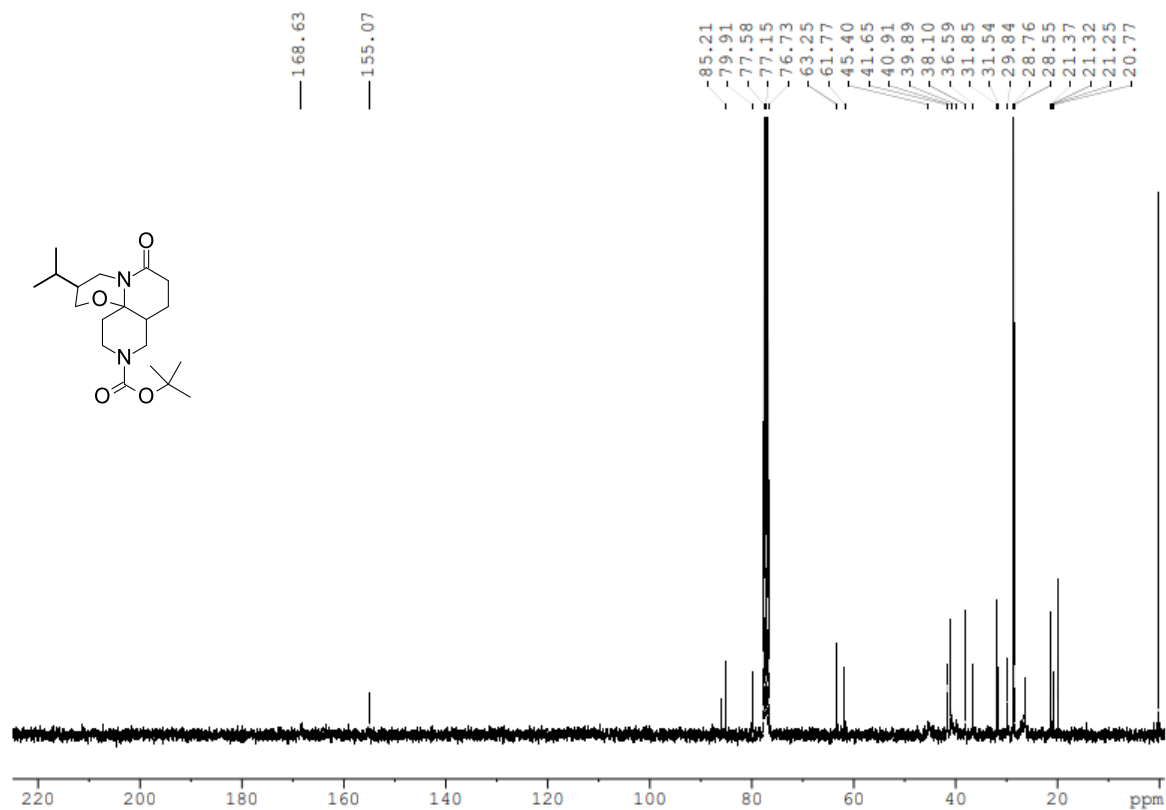

**23**,  $^1\text{H}$  NMR (300 MHz,  $\text{CDCl}_3$ )

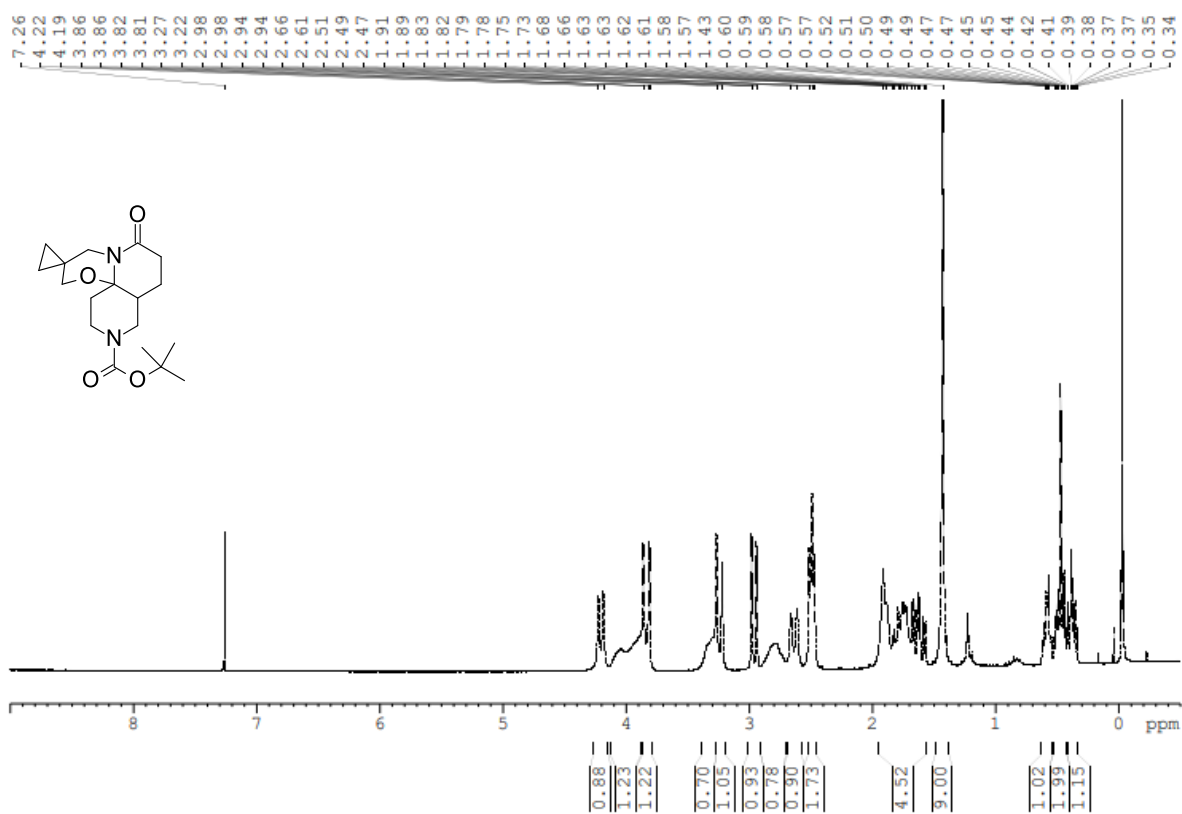

**23**,  $^{13}\text{C}$  NMR (75 MHz,  $\text{CDCl}_3$ )

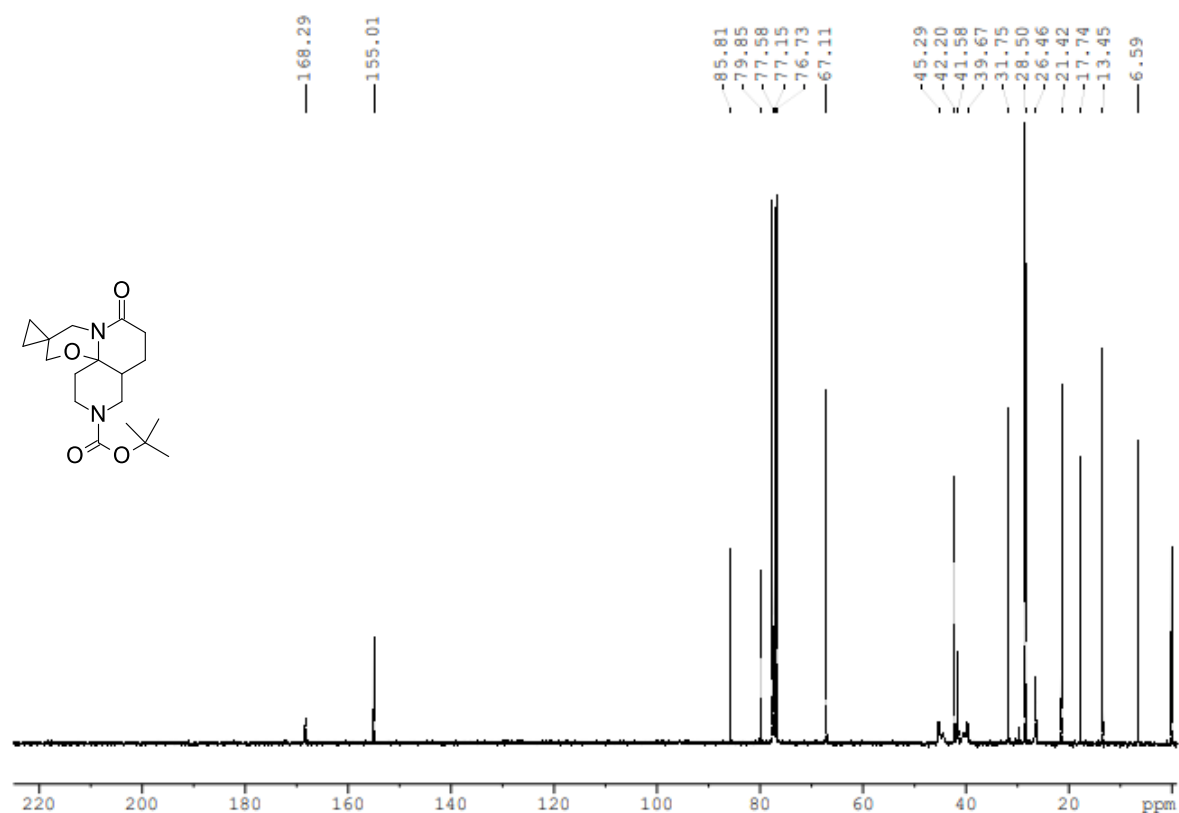

**24**,  $^1\text{H}$  NMR (300 MHz,  $\text{CDCl}_3$ )

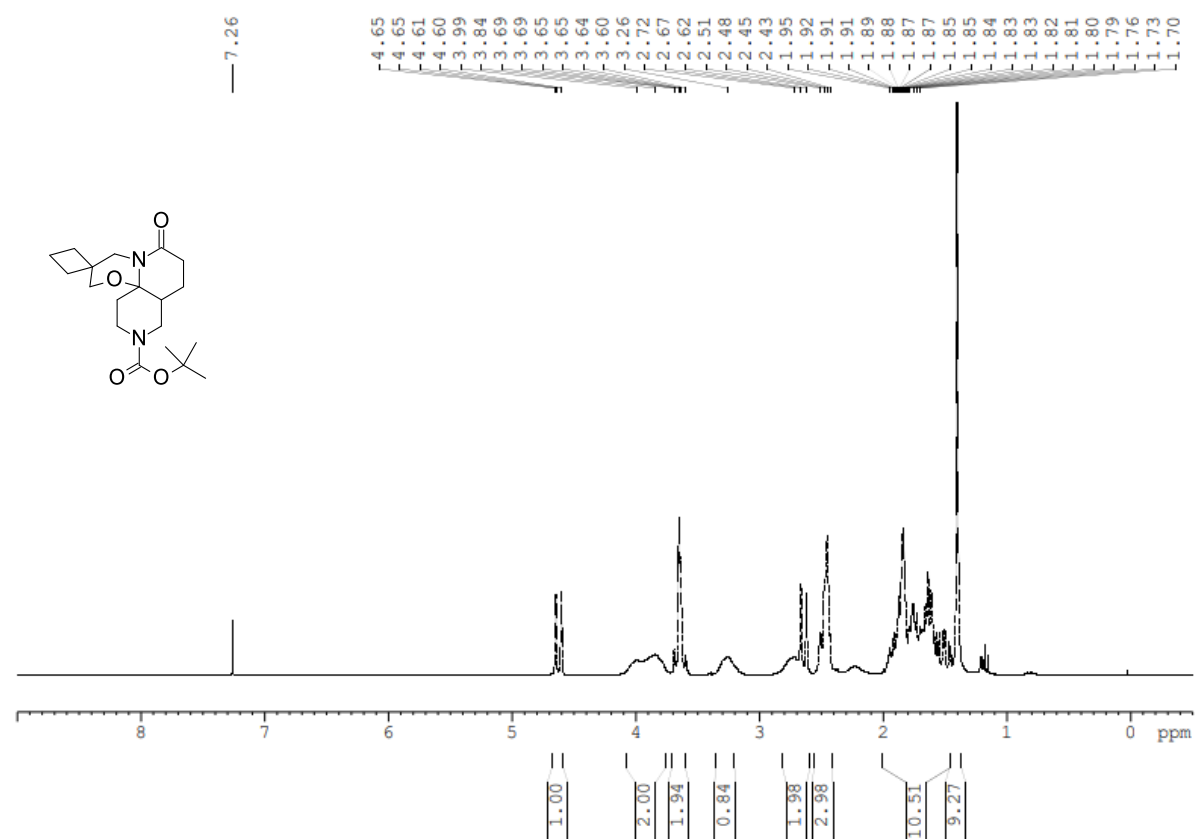



**24**,  $^{13}\text{C}$  NMR (75 MHz,  $\text{CDCl}_3$ )

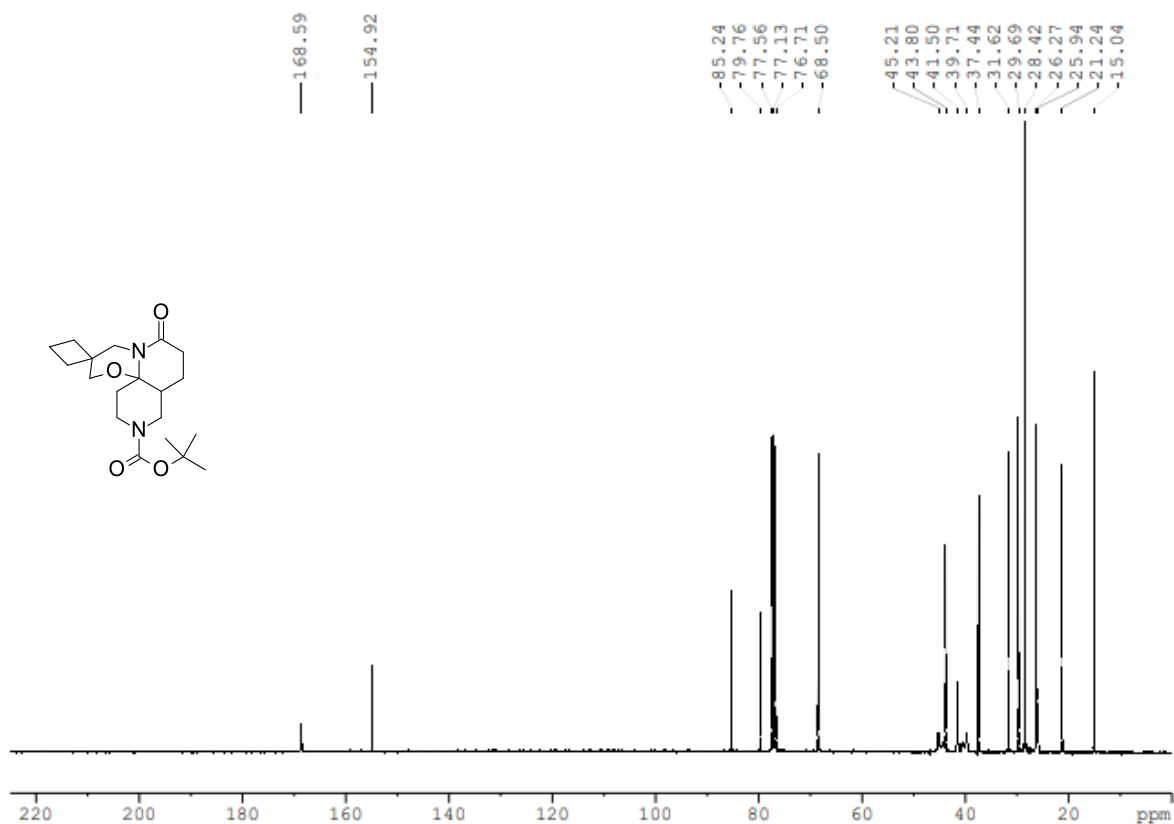

**25**,  $^1\text{H}$  NMR (300 MHz,  $\text{CDCl}_3$ )

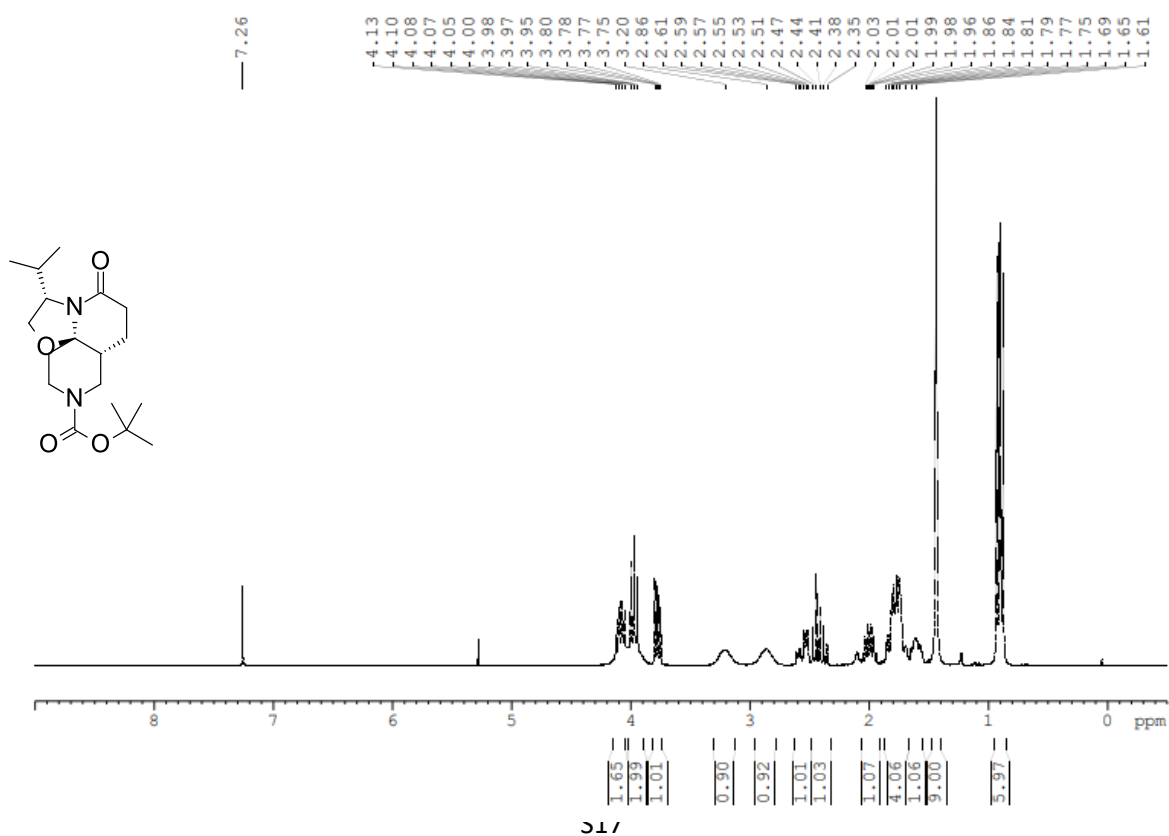

**25**,  $^{13}\text{C}$  NMR (75 MHz,  $\text{CDCl}_3$ )

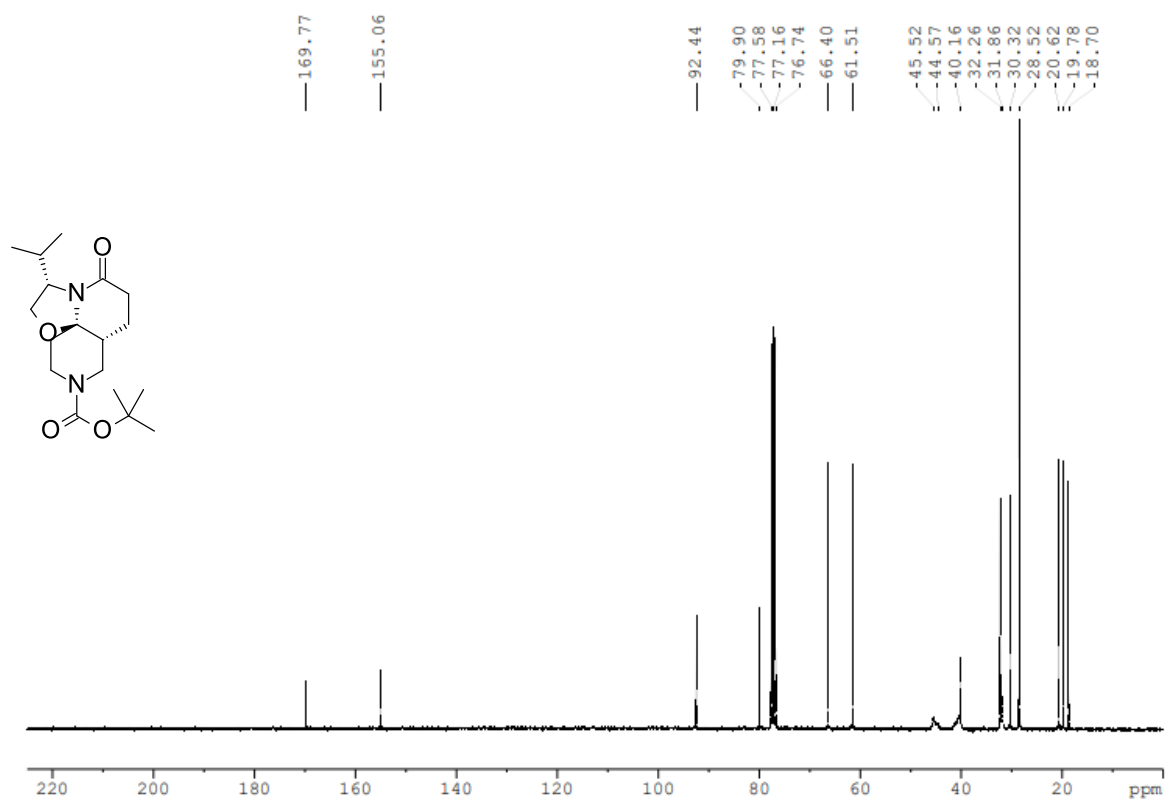

**26**,  $^1\text{H}$  NMR (300 MHz,  $\text{CDCl}_3$ )

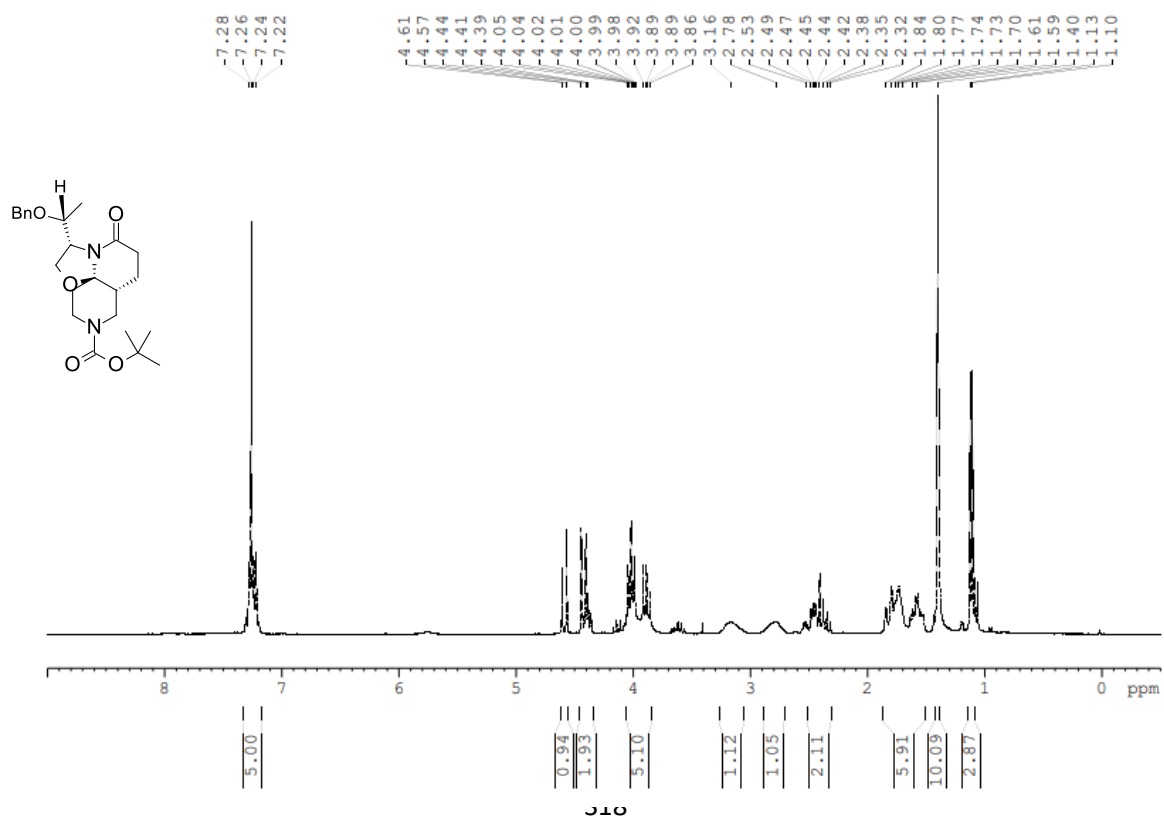

**26**,  $^{13}\text{C}$  NMR (75 MHz,  $\text{CDCl}_3$ )

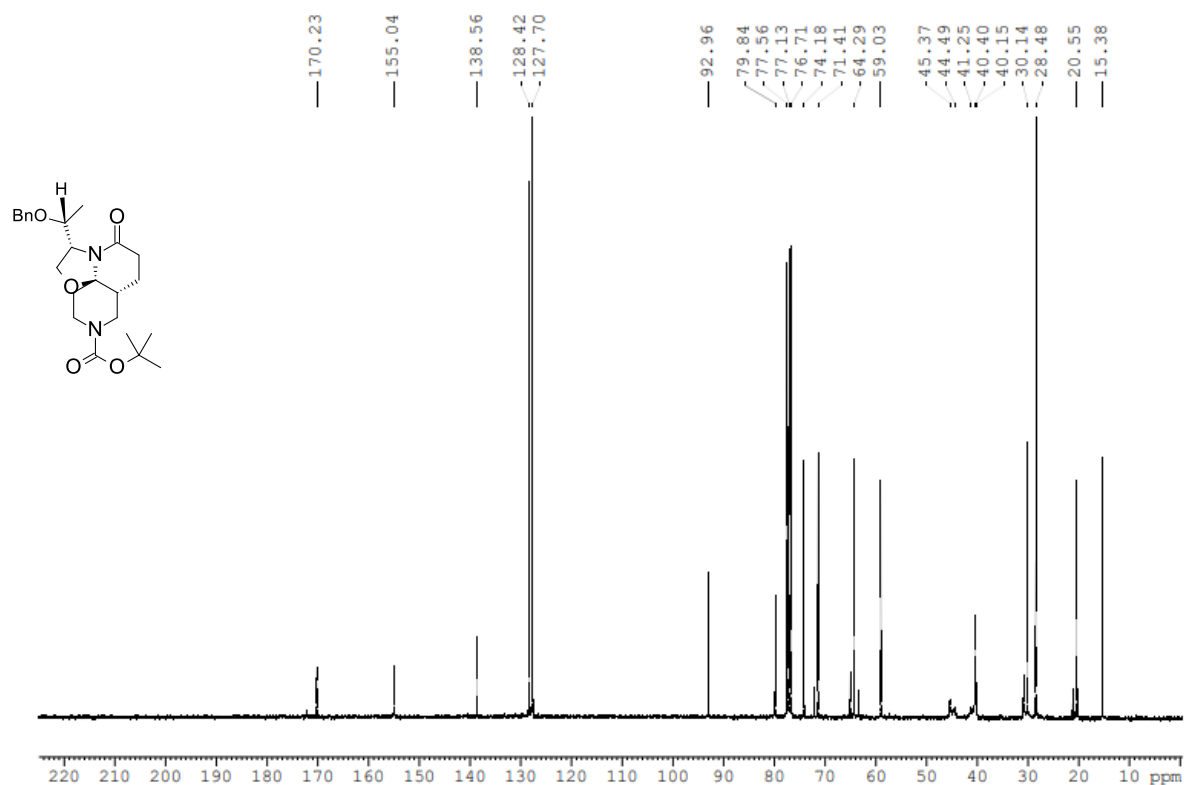

**27**,  $^1\text{H}$  NMR (300 MHz,  $\text{CDCl}_3$ )

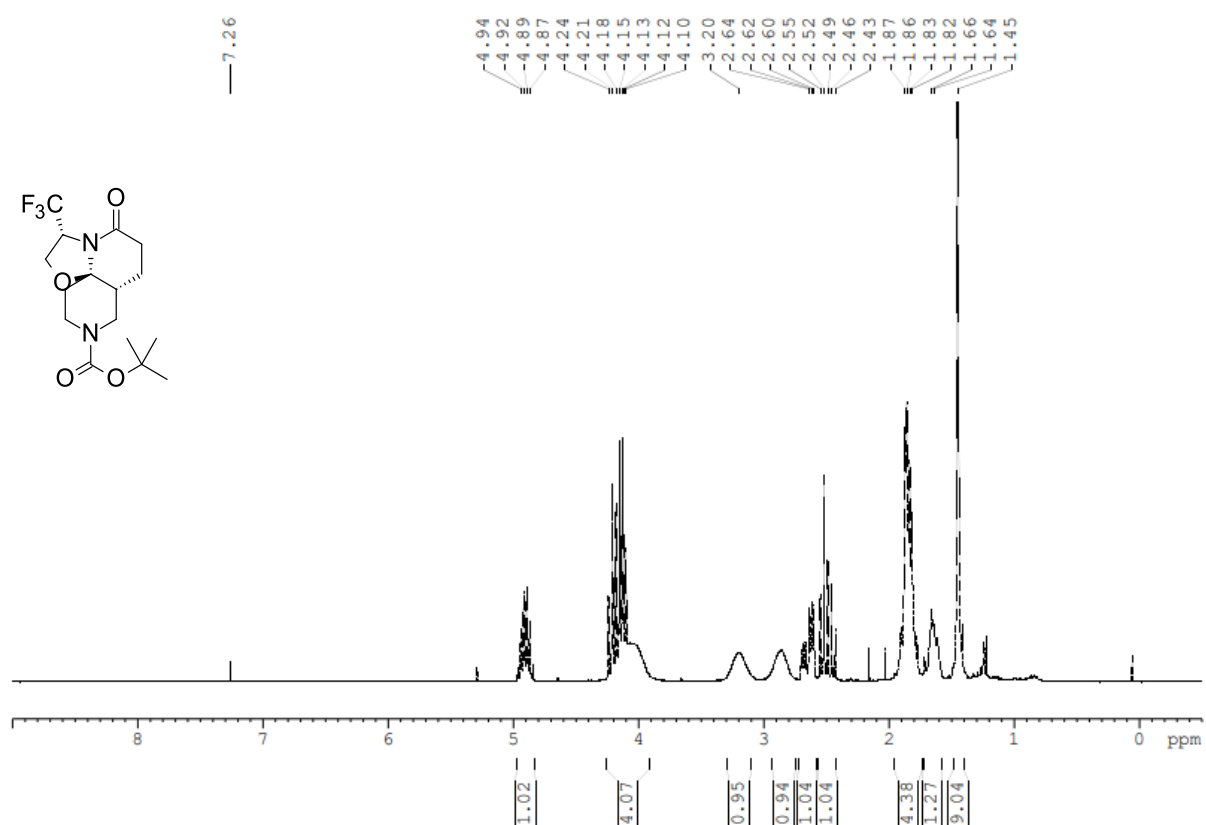

**27**,  $^{13}\text{C}$  NMR (75 MHz,  $\text{CDCl}_3$ )

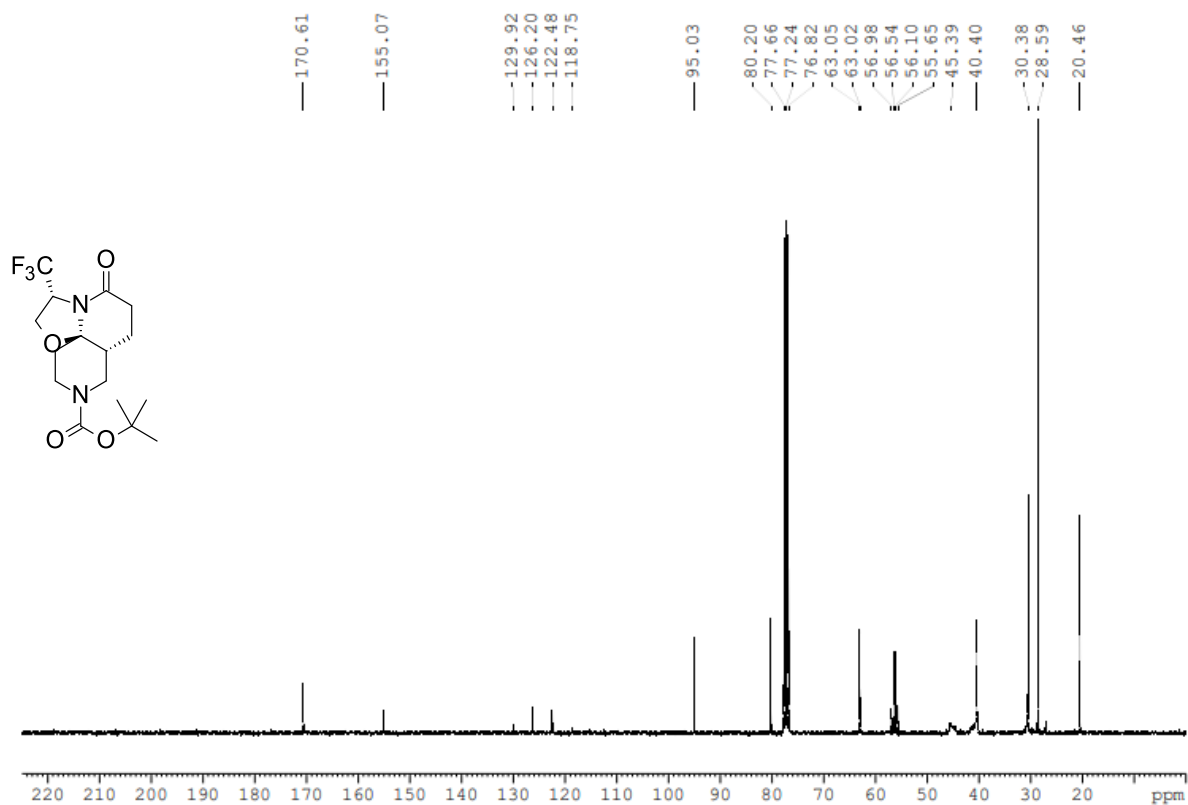

**28**,  $^1\text{H}$  NMR (300 MHz,  $\text{CDCl}_3$ )

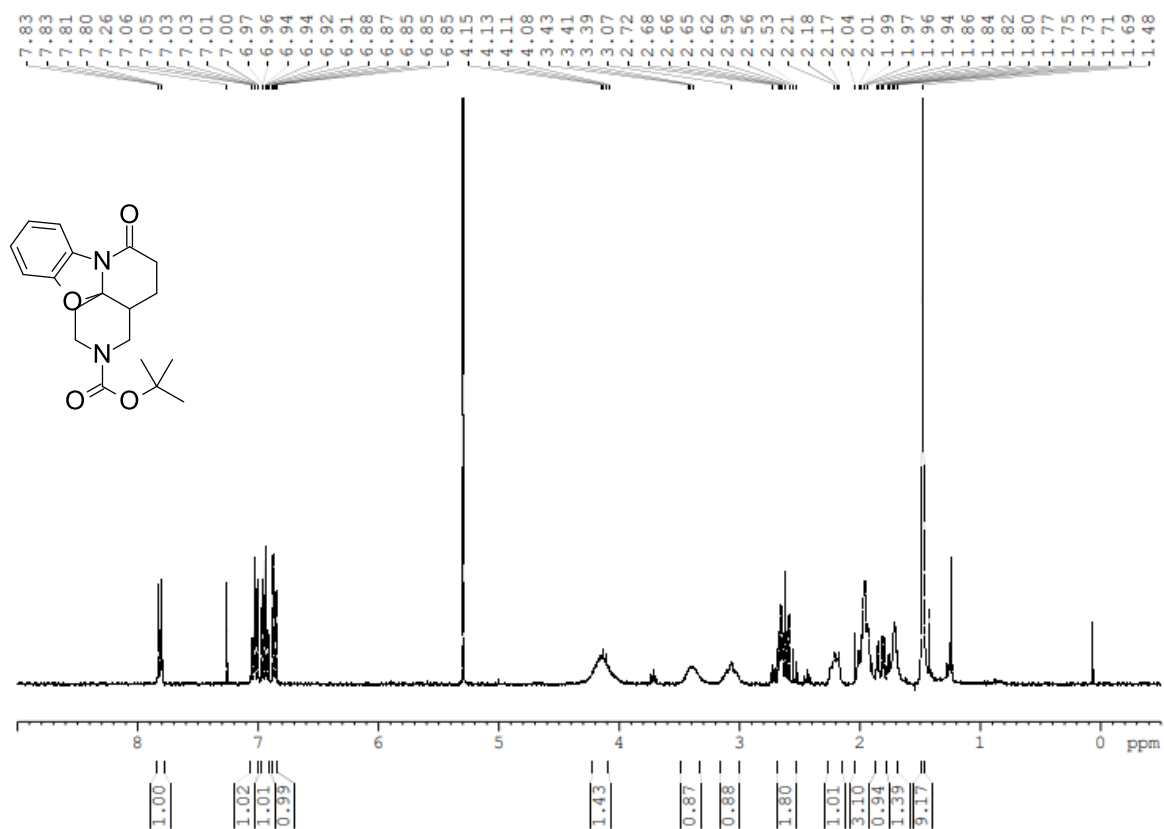

**28**,  $^{13}\text{C}$  NMR (75 MHz,  $\text{CDCl}_3$ )

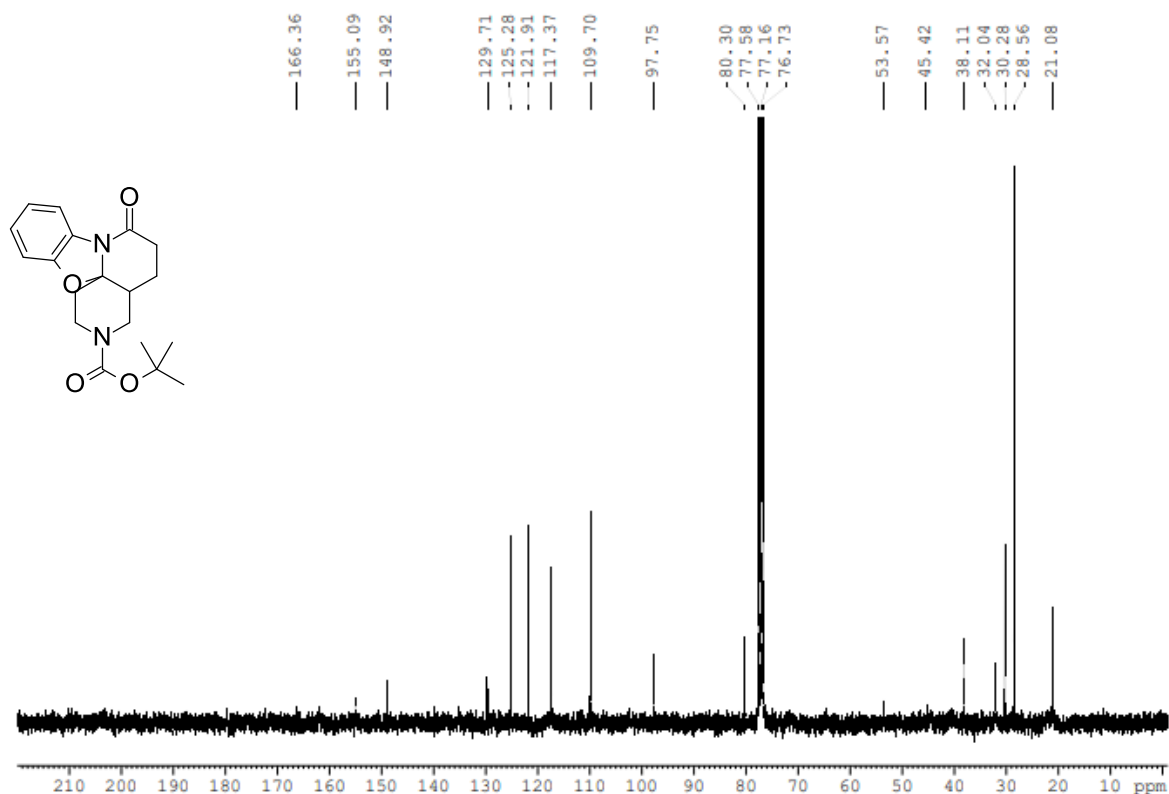

**29**,  $^1\text{H}$  NMR (300 MHz,  $\text{CDCl}_3$ )

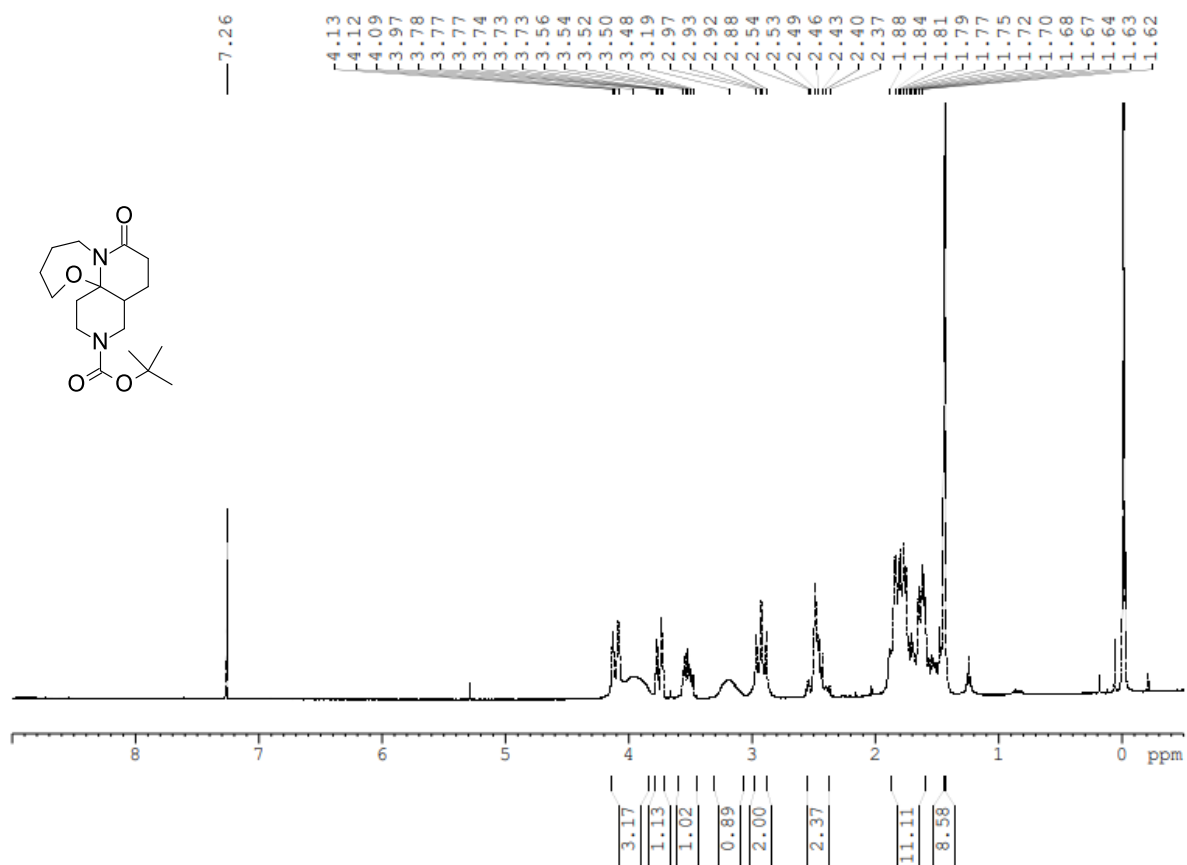

**29**,  $^{13}\text{C}$  NMR (75 MHz,  $\text{CDCl}_3$ )

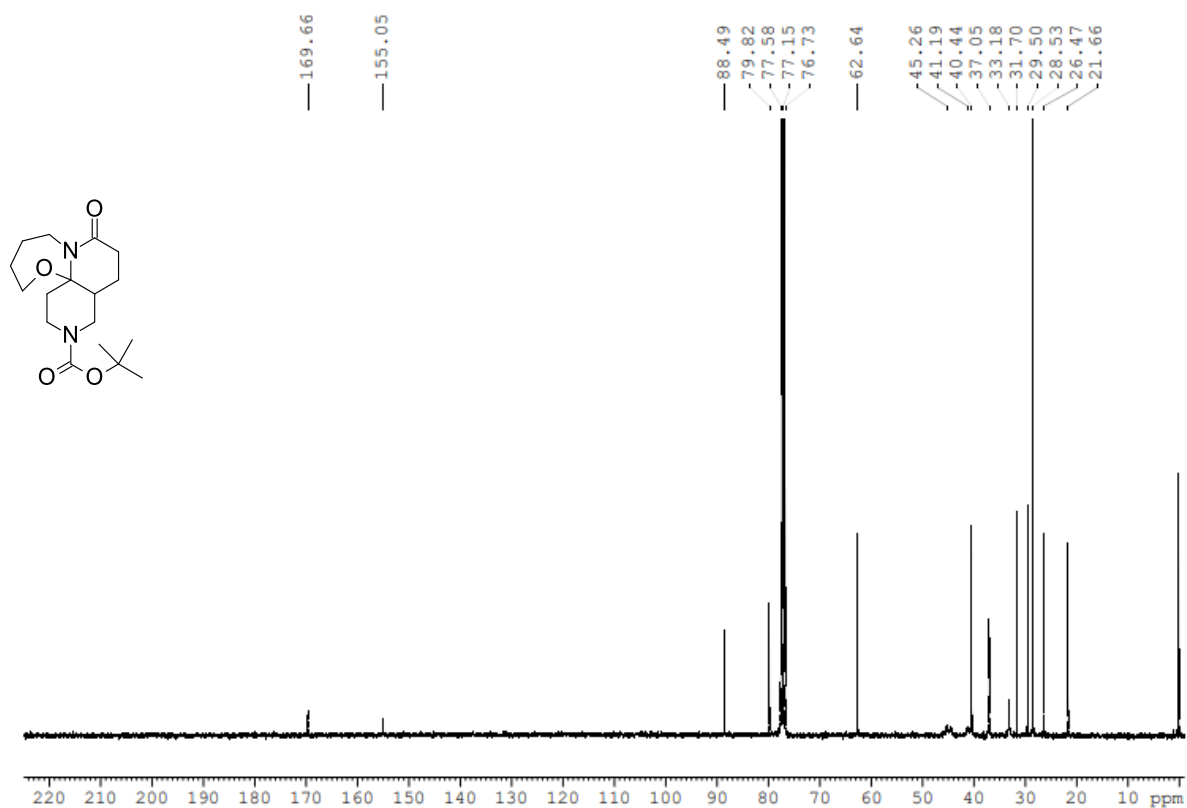

**31**,  $^1\text{H}$  NMR (300 MHz,  $\text{CDCl}_3$ )

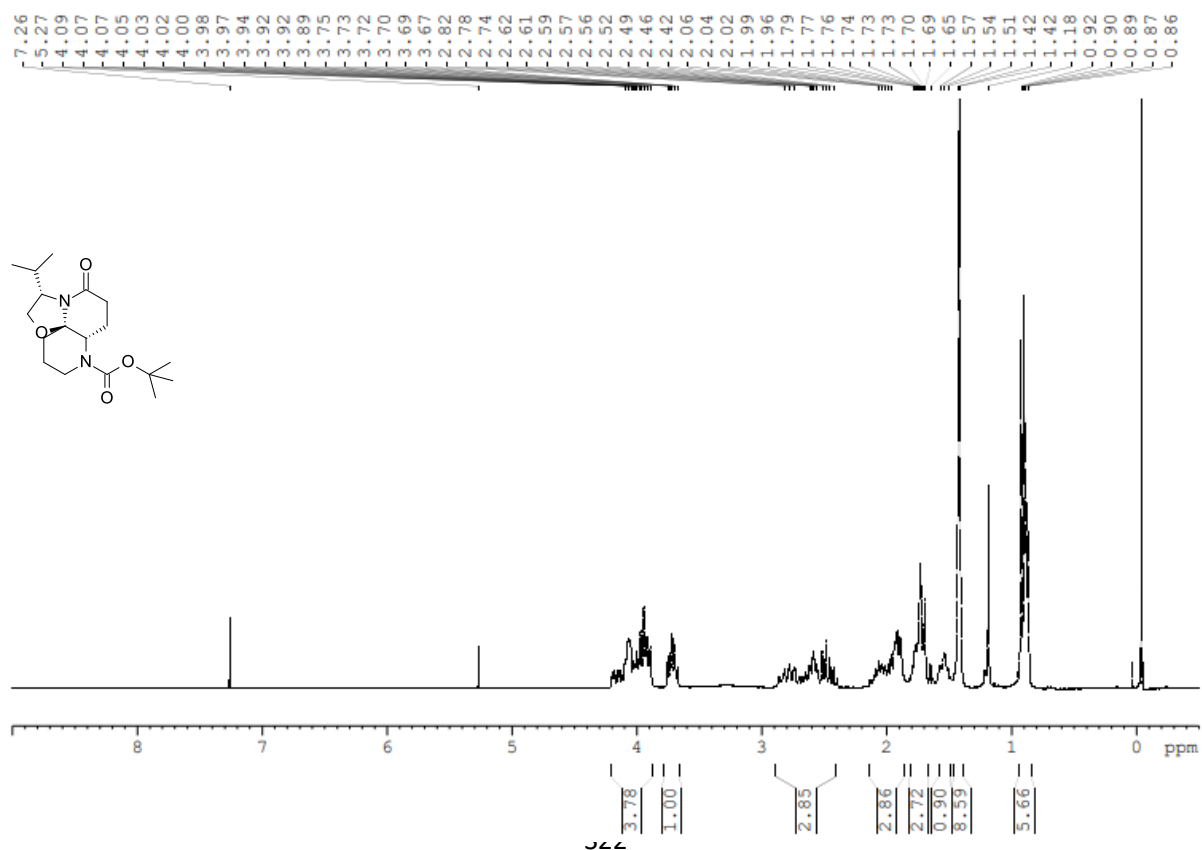

**31,**  $^{13}\text{C}$  NMR (75 MHz,  $\text{CDCl}_3$ )

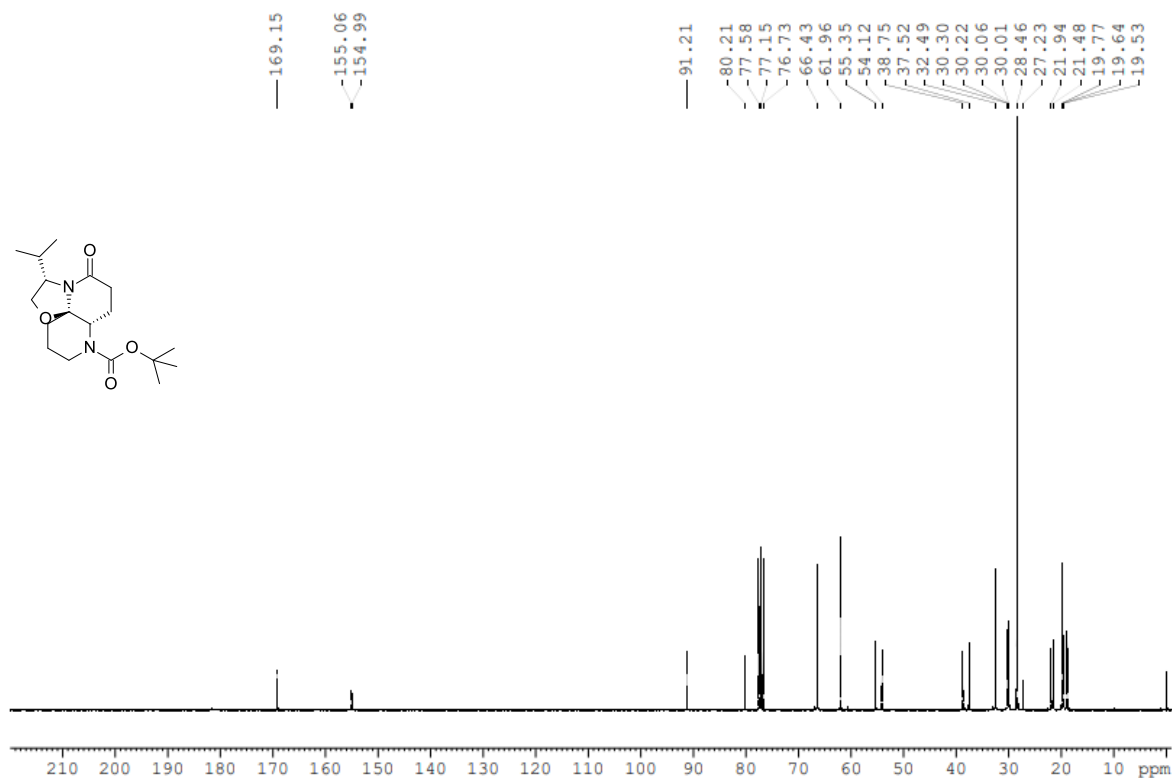

**33,**  $^1\text{H}$  NMR (300 MHz,  $\text{CDCl}_3$ )

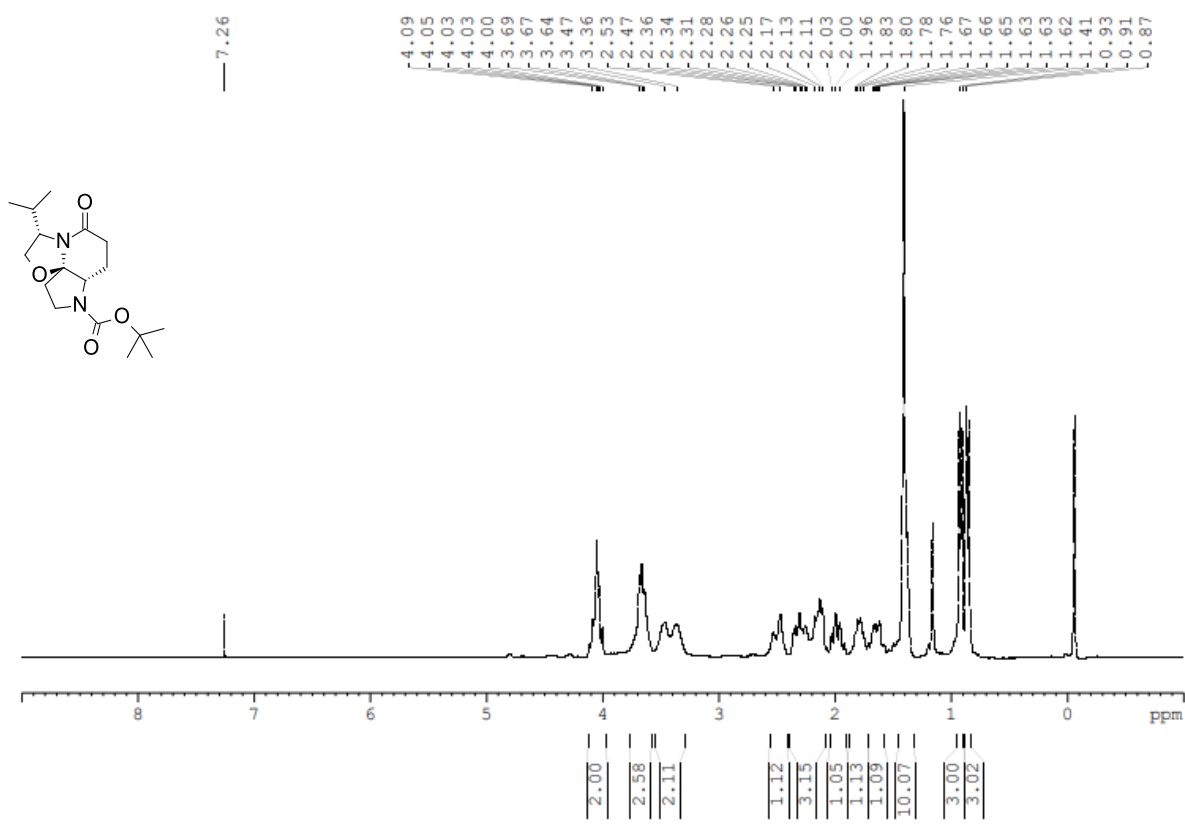

**33**,  $^{13}\text{C}$  NMR (75 MHz,  $\text{CDCl}_3$ )

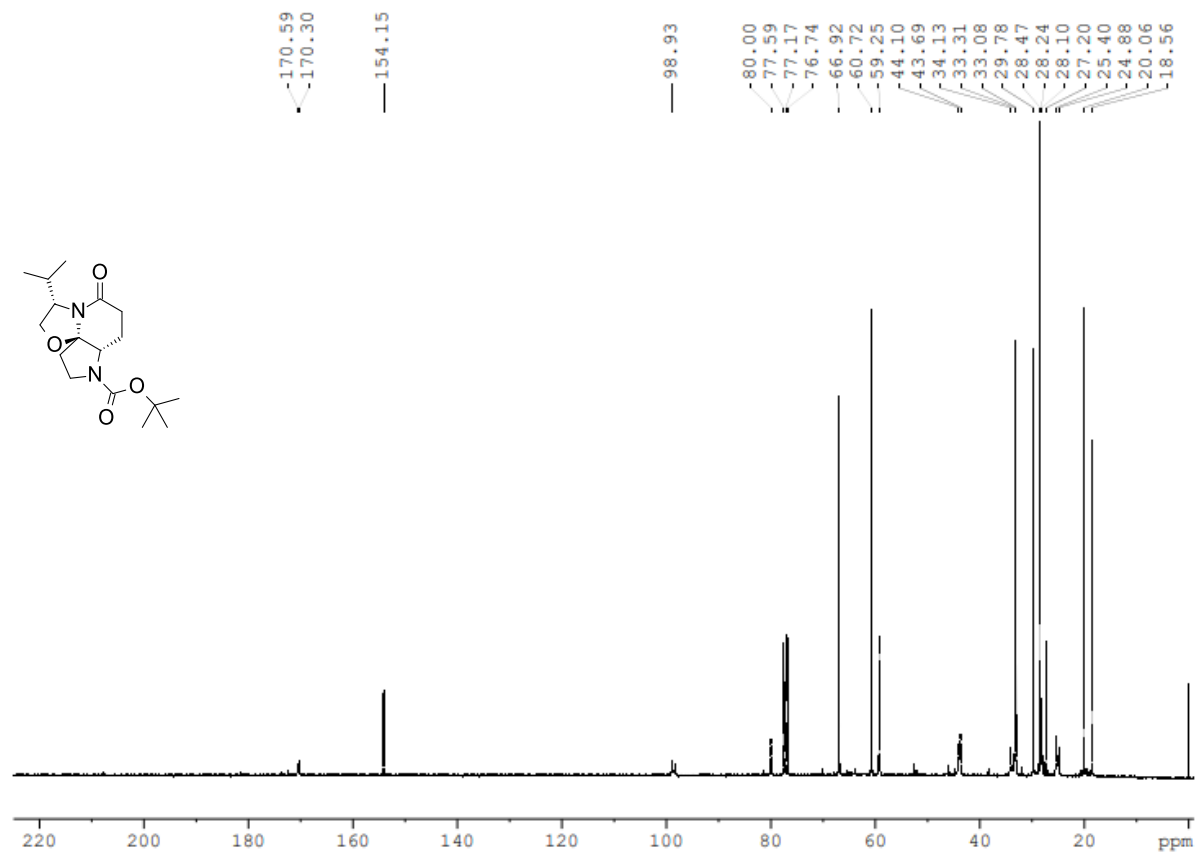

**35**,  $^1\text{H}$  NMR (300 MHz,  $\text{CDCl}_3$ )

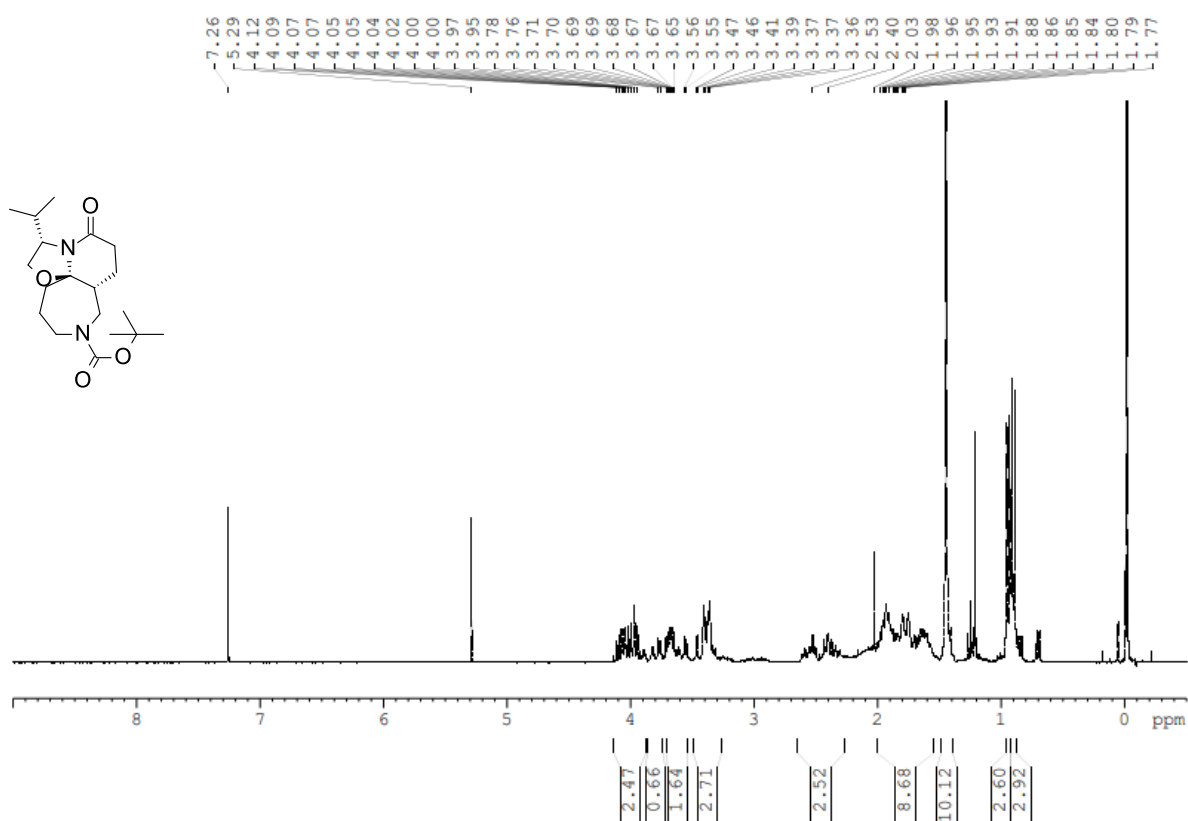



**35**,  $^{13}\text{C}$  NMR (75 MHz,  $\text{CDCl}_3$ )

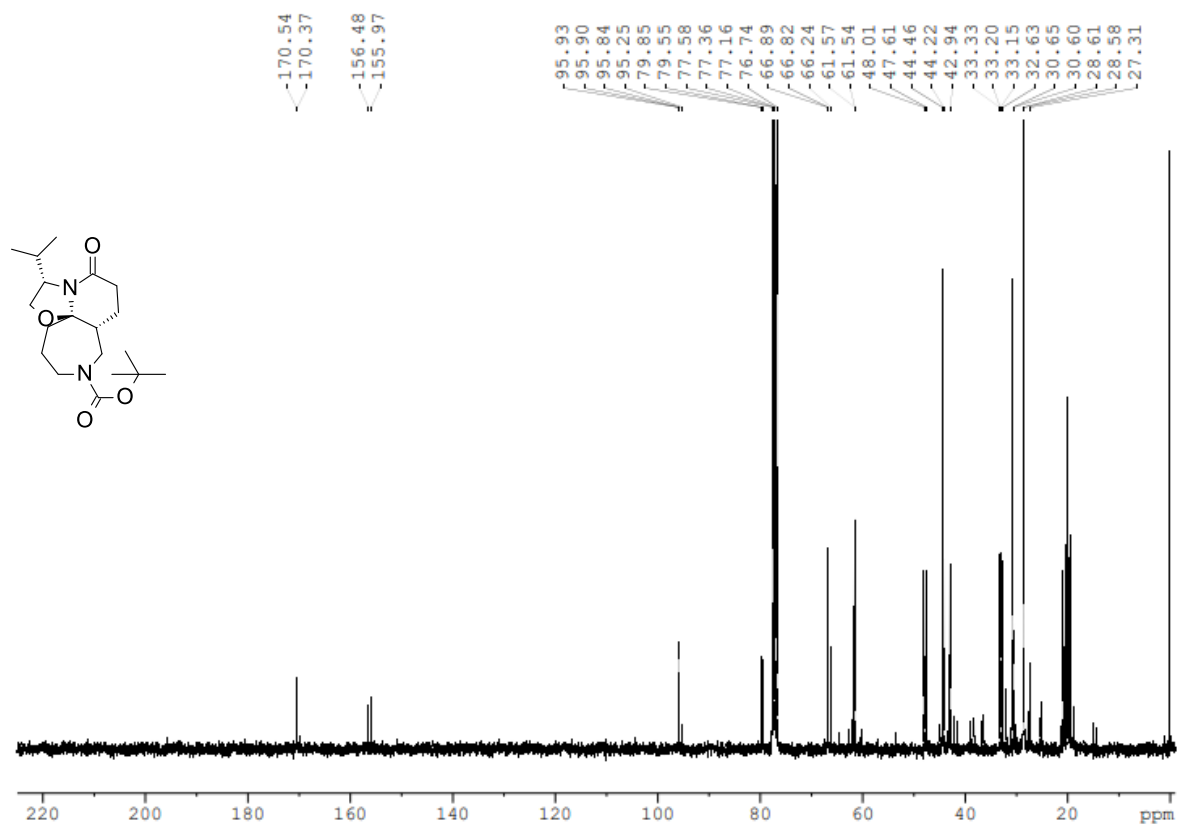

**37**,  $^1\text{H}$  NMR (300 MHz,  $\text{CDCl}_3$ )

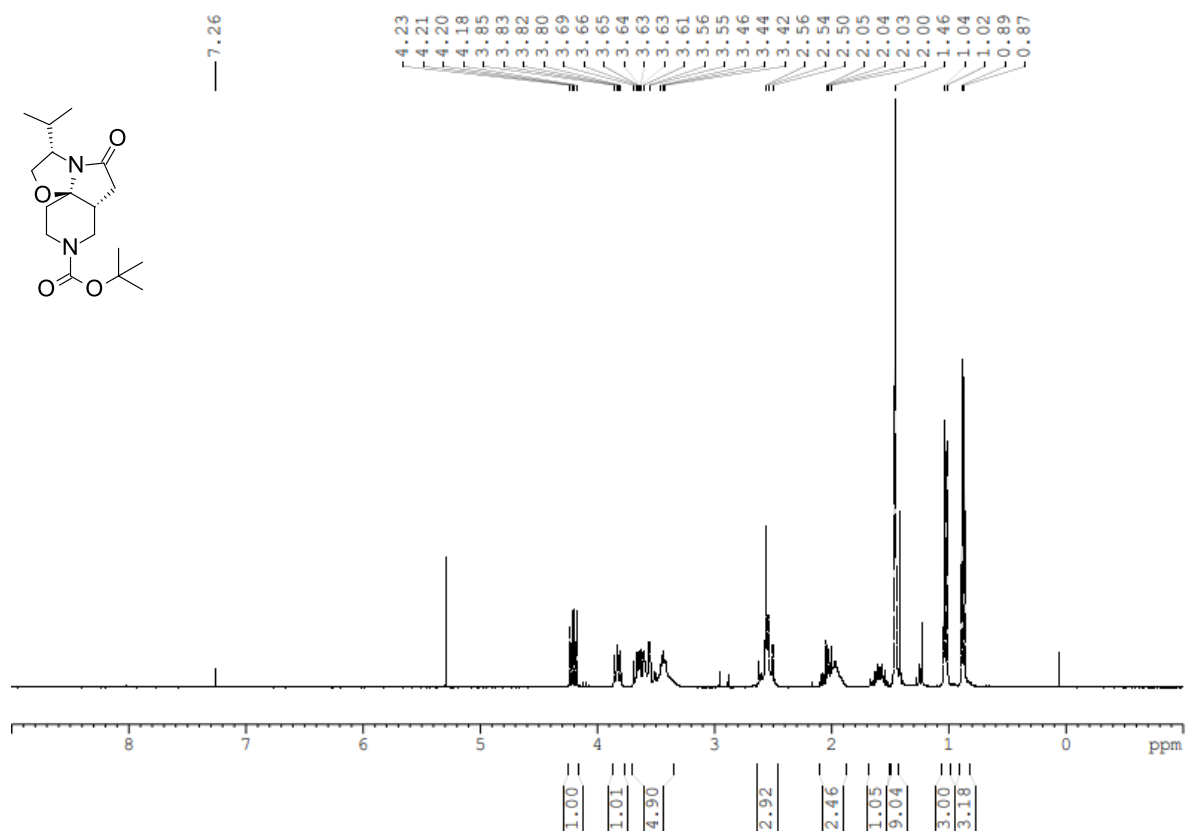

**37**,  $^{13}\text{C}$  NMR (75 MHz,  $\text{CDCl}_3$ )

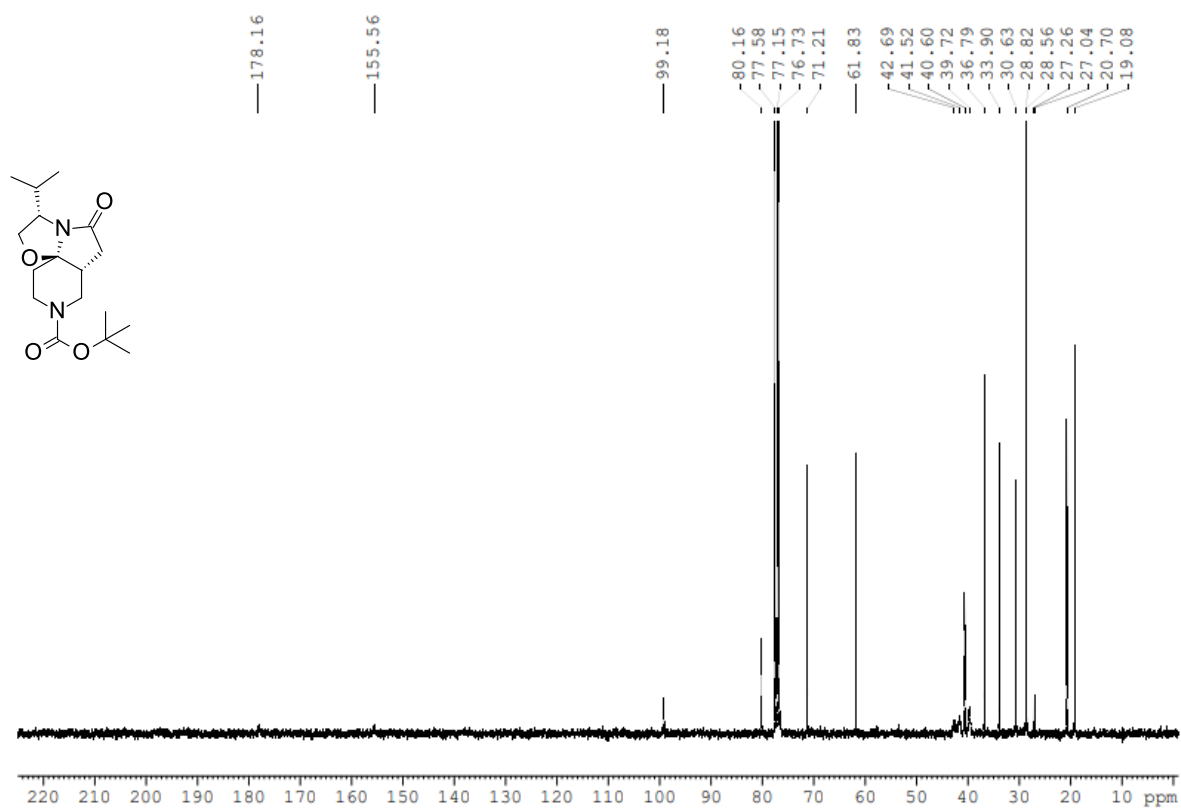

**39**,  $^1\text{H}$  NMR (300 MHz,  $\text{CDCl}_3$ )

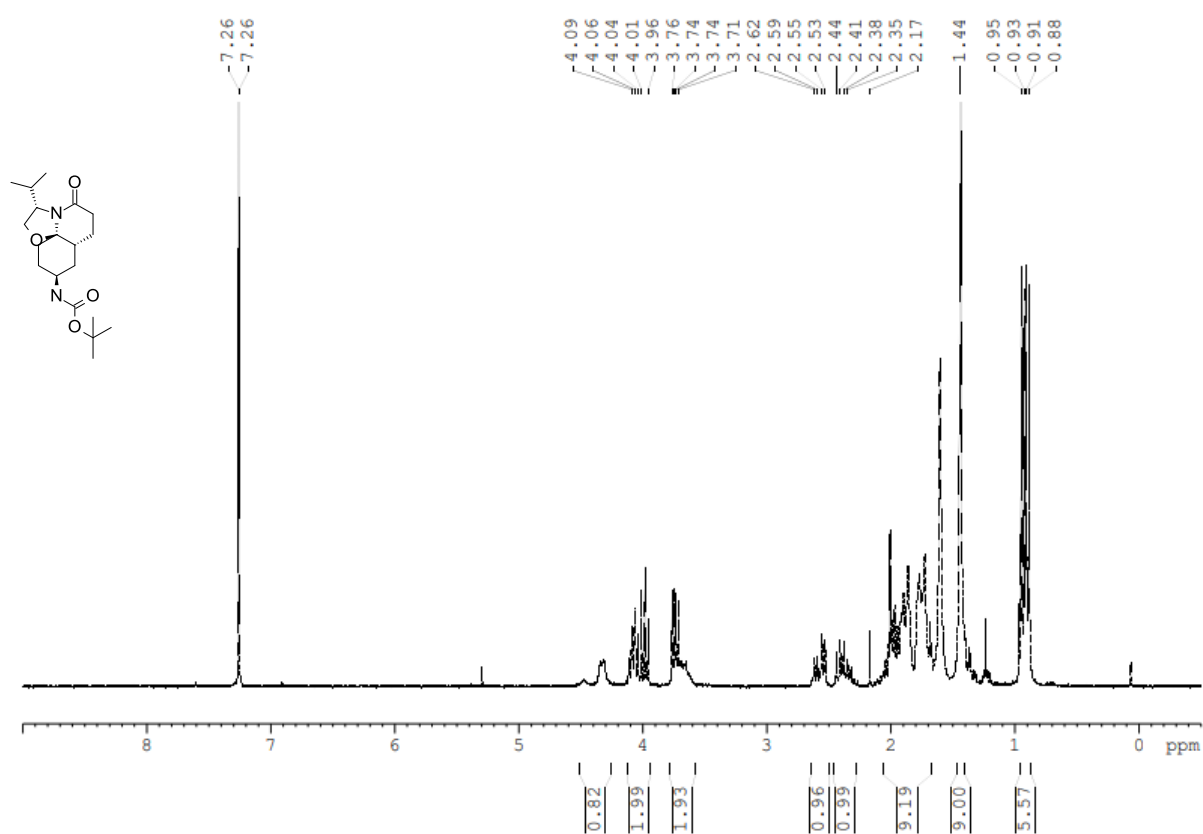

**39**,  $^{13}\text{C}$  NMR (75 MHz,  $\text{CDCl}_3$ )

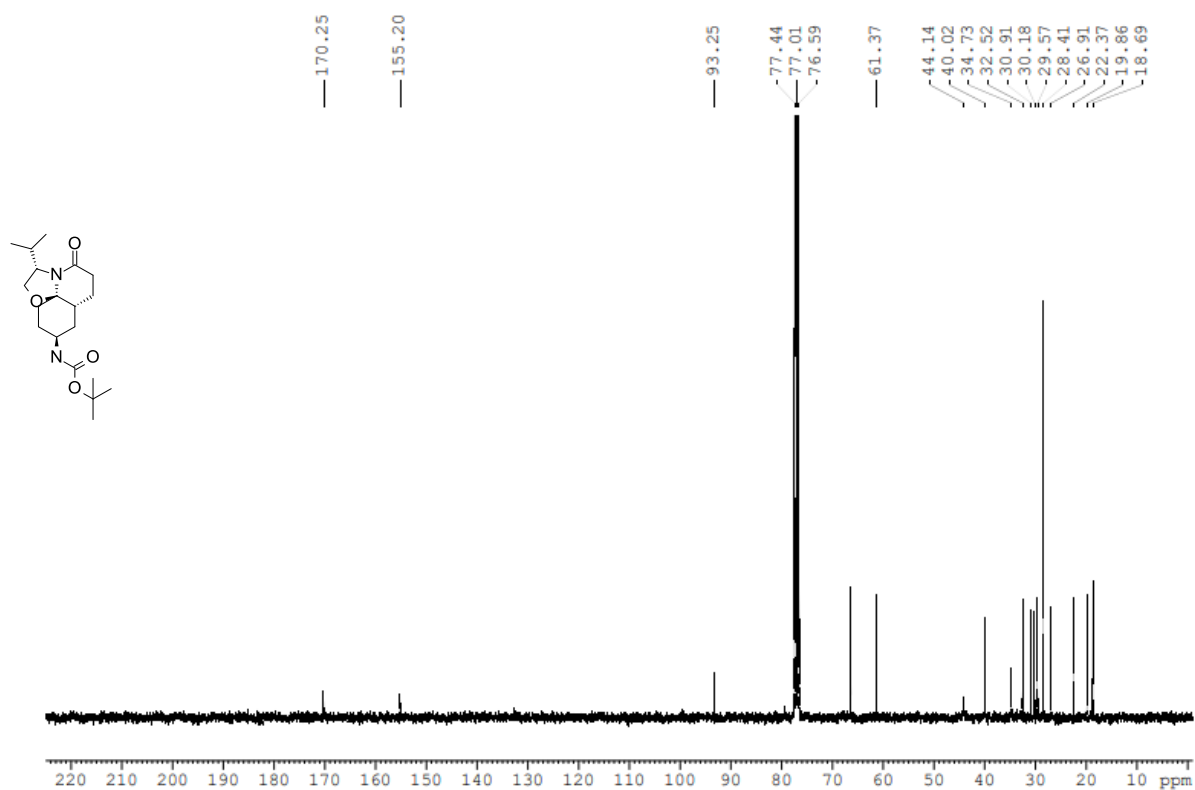

**40**,  $^1\text{H}$  NMR (300 MHz,  $\text{CDCl}_3$ )

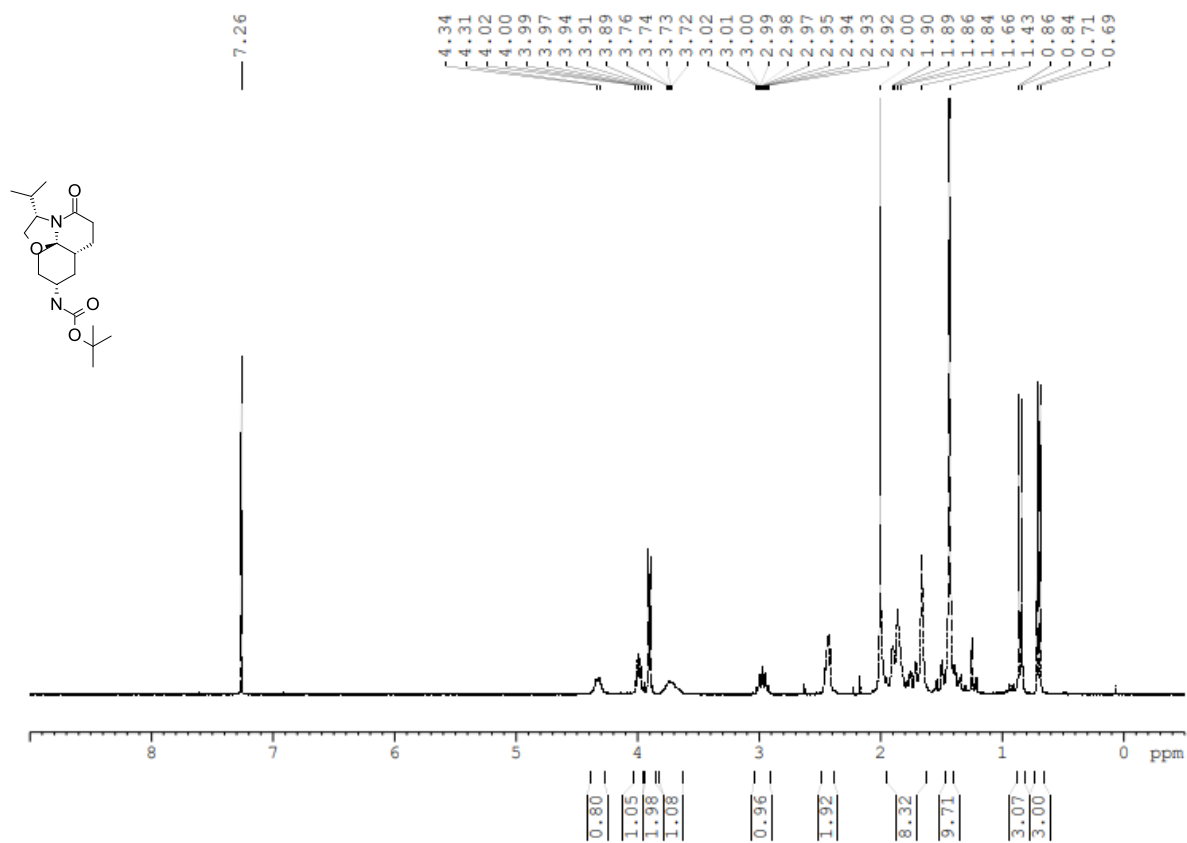

**40**,  $^{13}\text{C}$  NMR (75 MHz,  $\text{CDCl}_3$ )

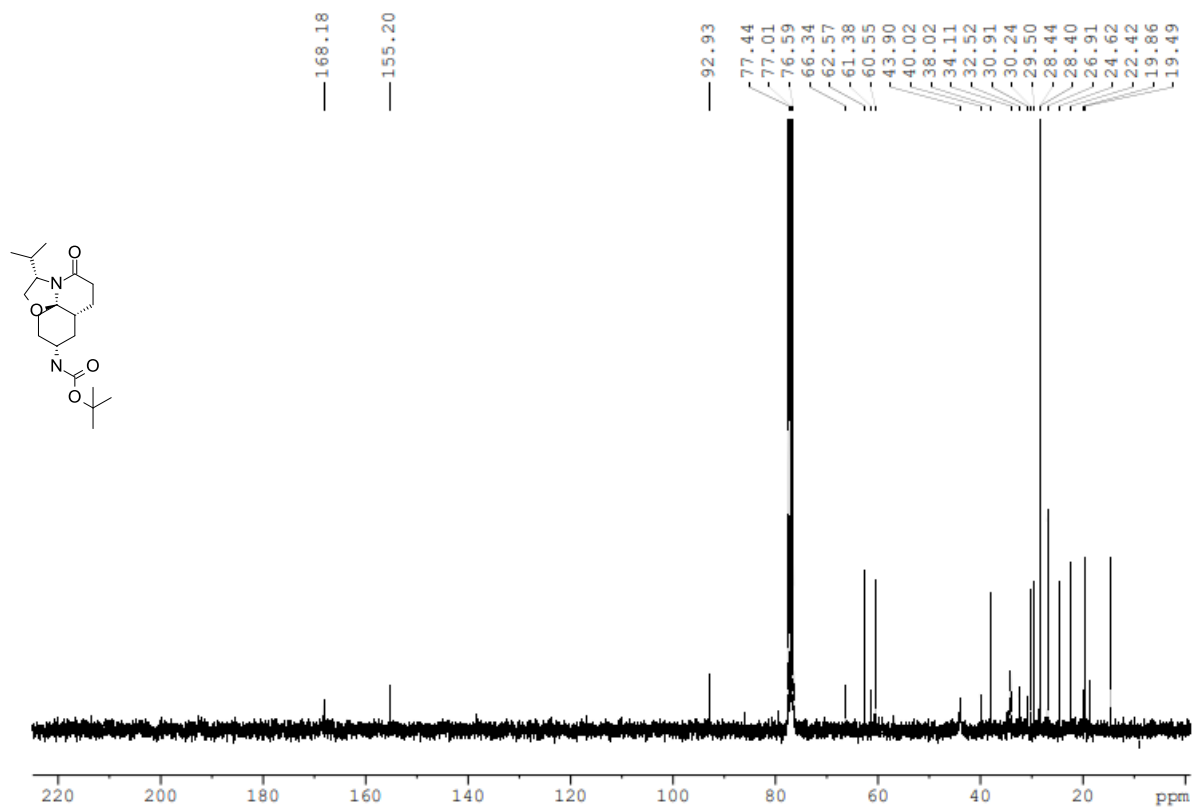

**41 or 41'** (diastereoisomer **1**),  $^1\text{H}$  NMR (300 MHz,  $\text{CDCl}_3$ )

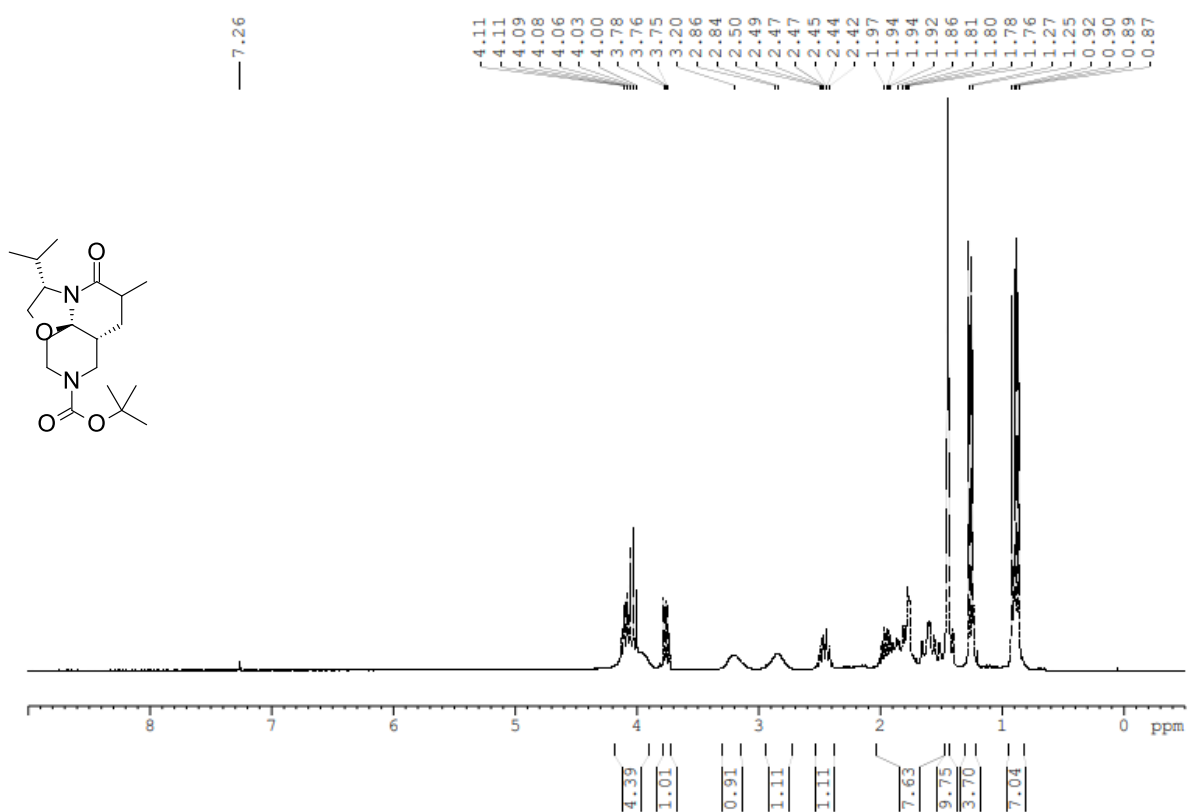

**41 or 41' (diastereoisomer 1),  $^{13}\text{C}$  NMR (75 MHz,  $\text{CDCl}_3$ )**

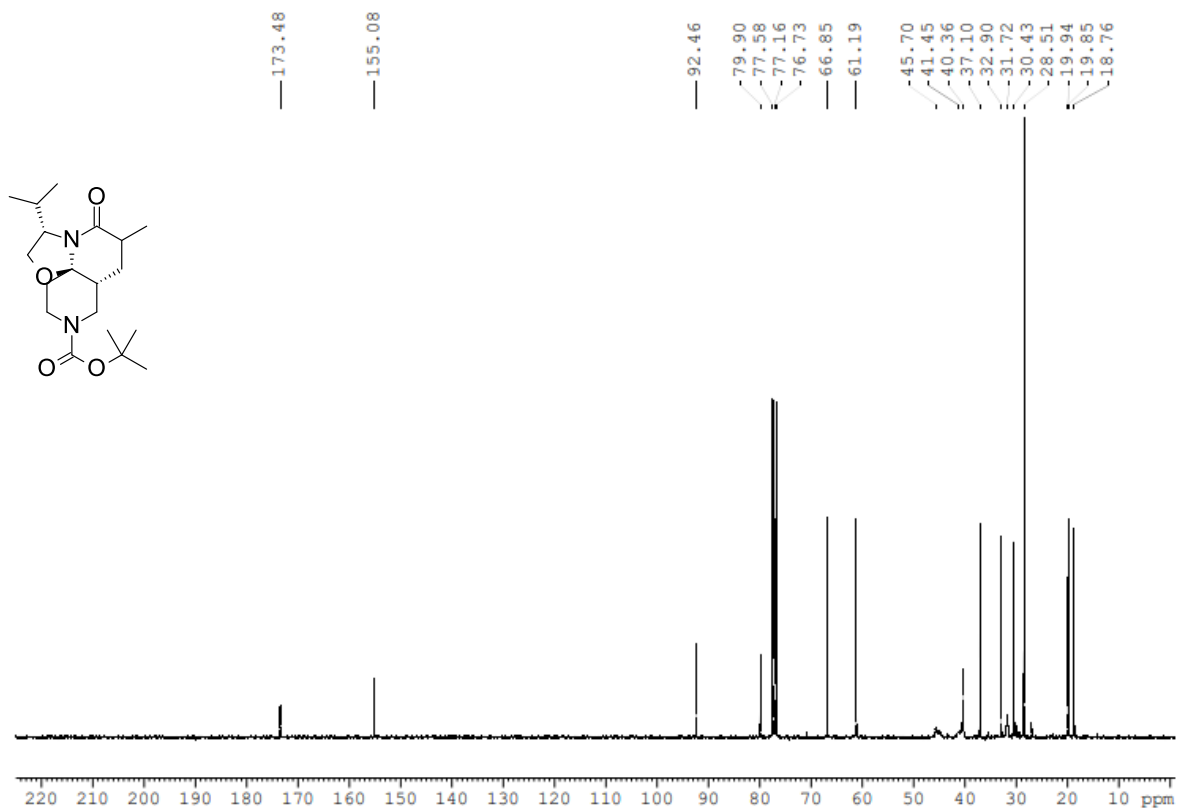

**41 or 41' (diastereoisomer 2),  $^1\text{H}$  NMR (300 MHz,  $\text{CDCl}_3$ )**

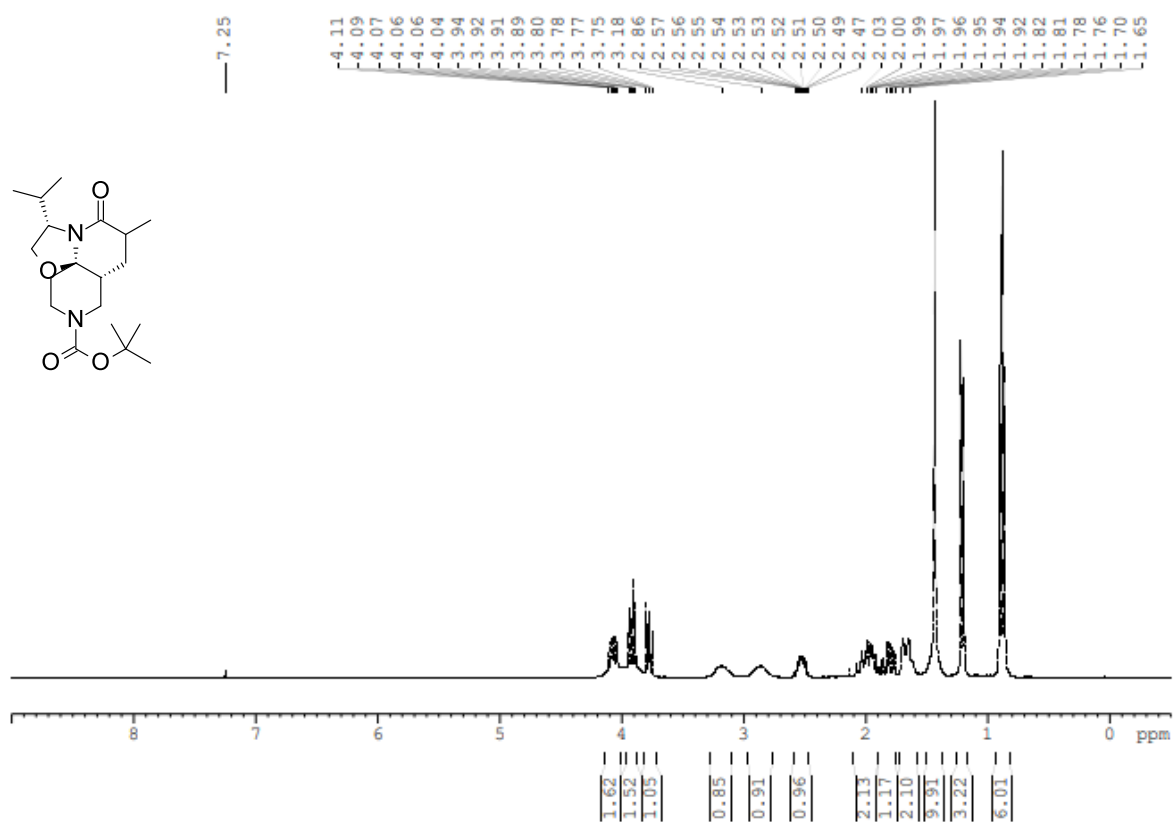

**41 or 41' (diastereoisomer 2),  $^{13}\text{C}$  NMR (75 MHz,  $\text{CDCl}_3$ )**

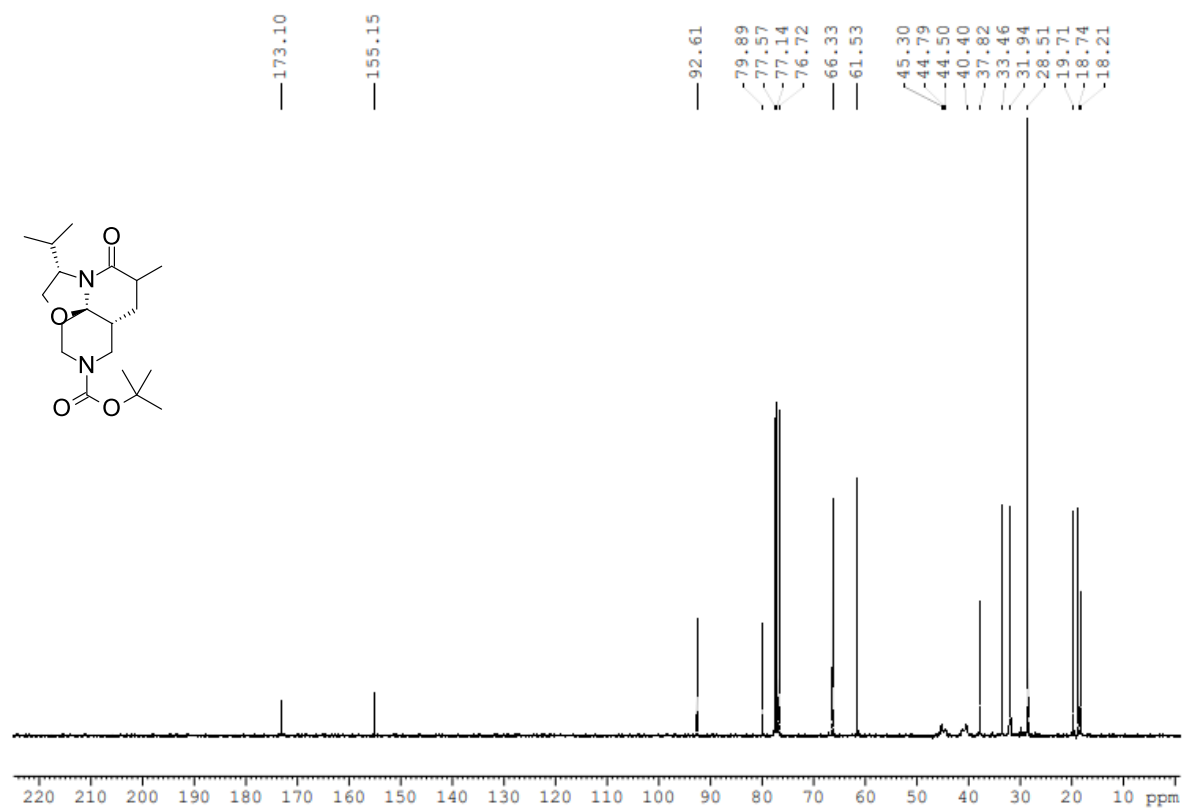

**42,  $^1\text{H}$  NMR (300 MHz,  $\text{CDCl}_3$ )**

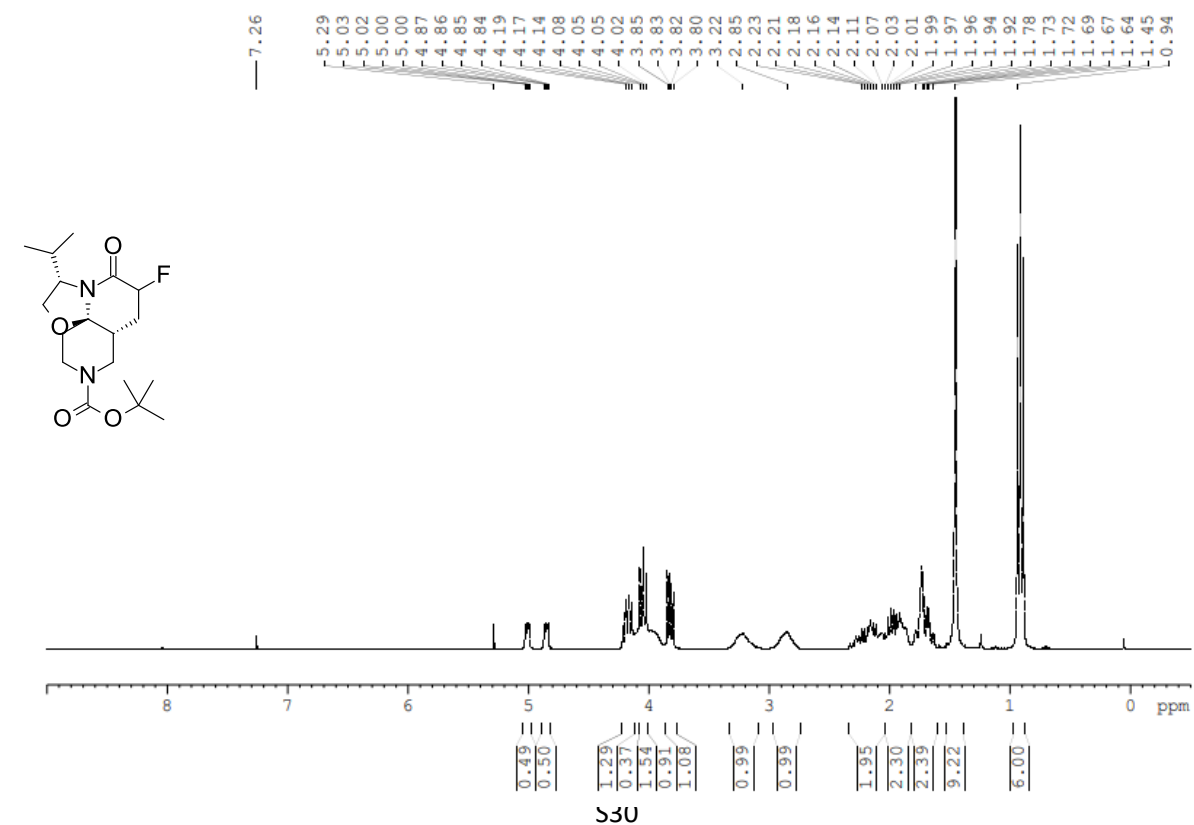

**42**,  $^{13}\text{C}$  NMR (75 MHz,  $\text{CDCl}_3$ )

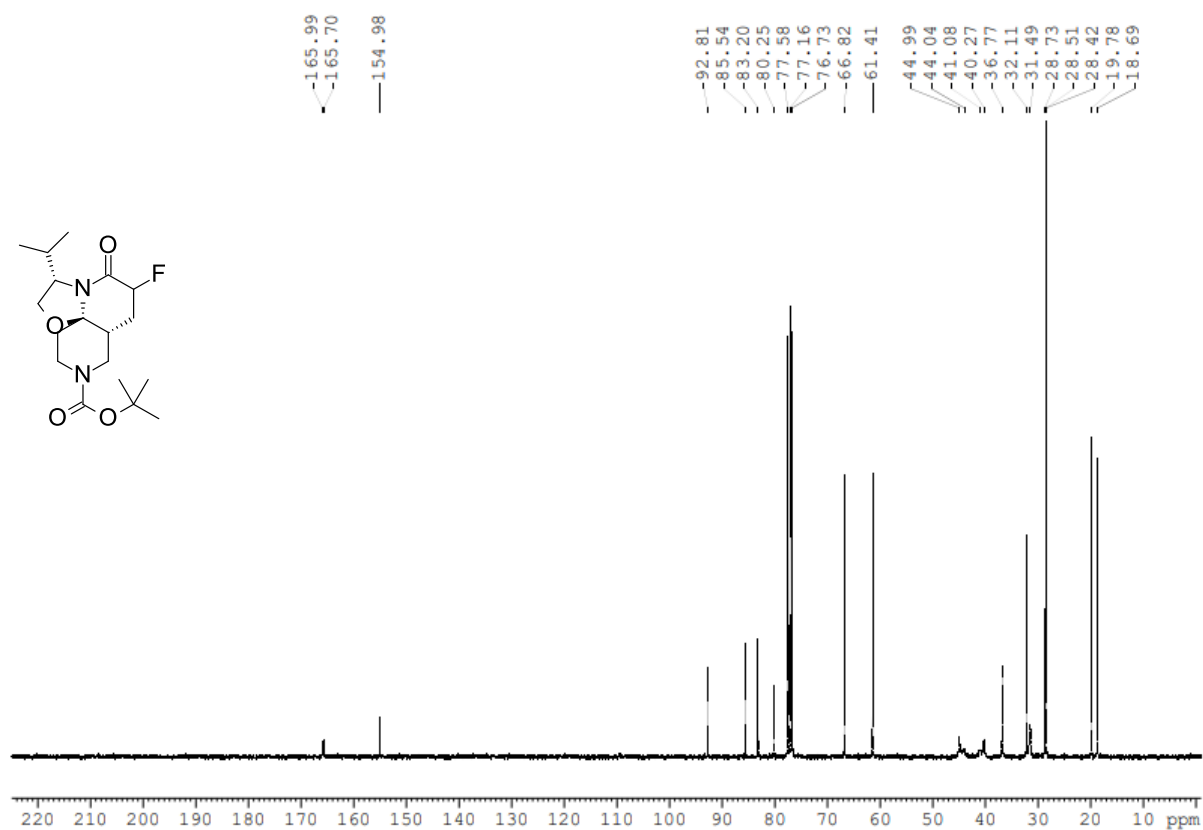

**43**,  $^1\text{H}$  NMR (300 MHz,  $\text{CD}_3\text{OD}$ )

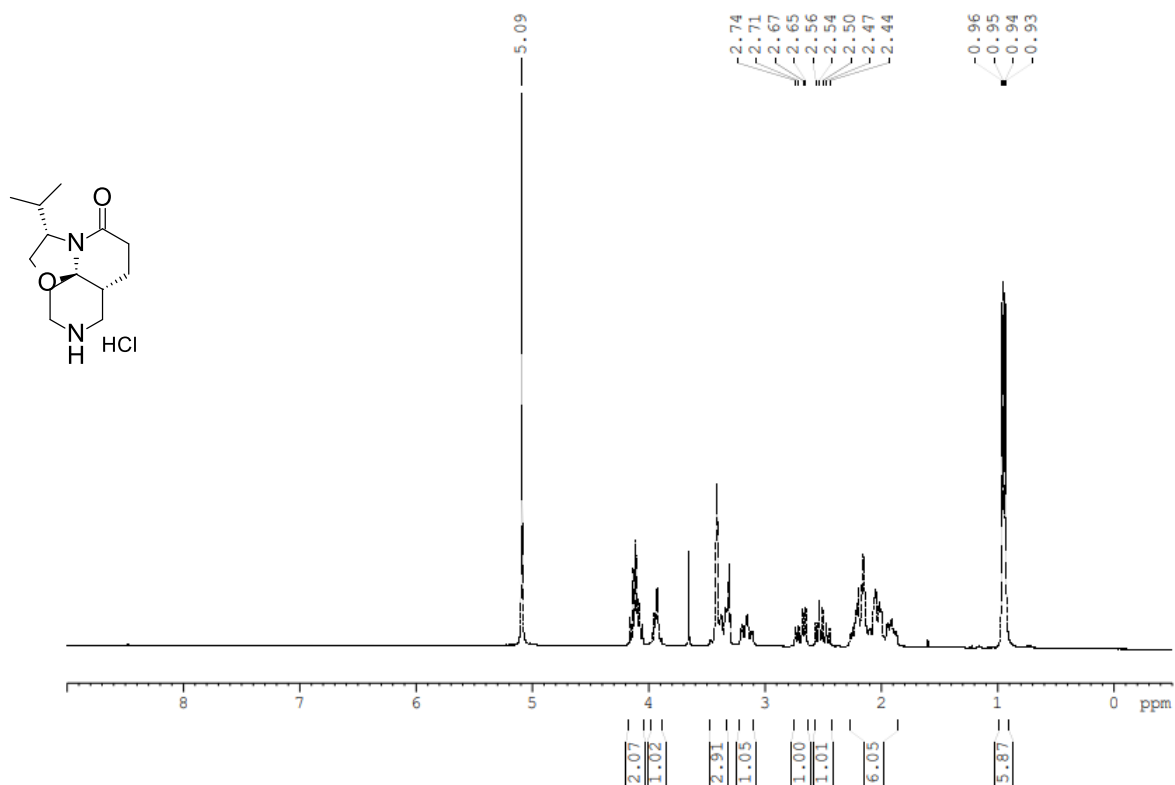

**43,**  $^{13}\text{C}$  NMR (75 MHz,  $\text{CD}_3\text{OD}$ )

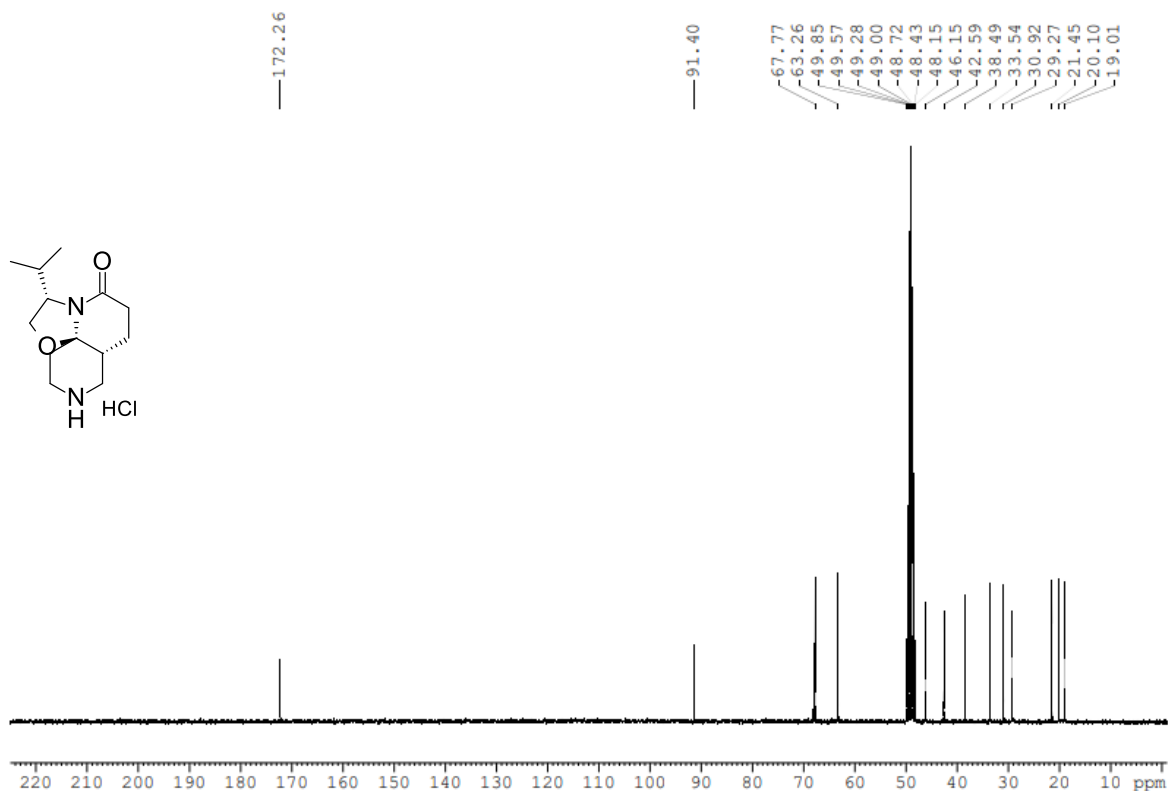

**44,**  $^1\text{H}$  NMR (300 MHz,  $\text{CD}_2\text{Cl}_2$ )

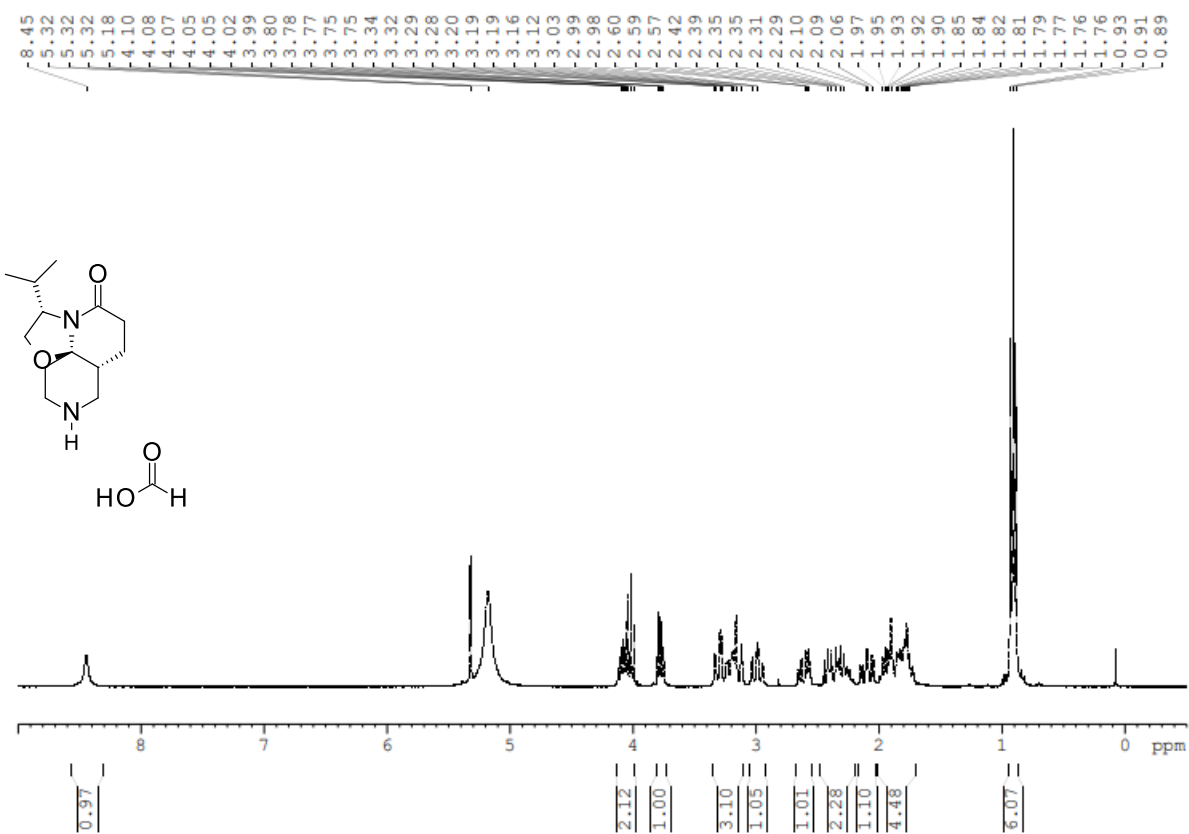



45,  $^1\text{H}$  NMR (300 MHz,  $\text{CD}_2\text{Cl}_2$ )

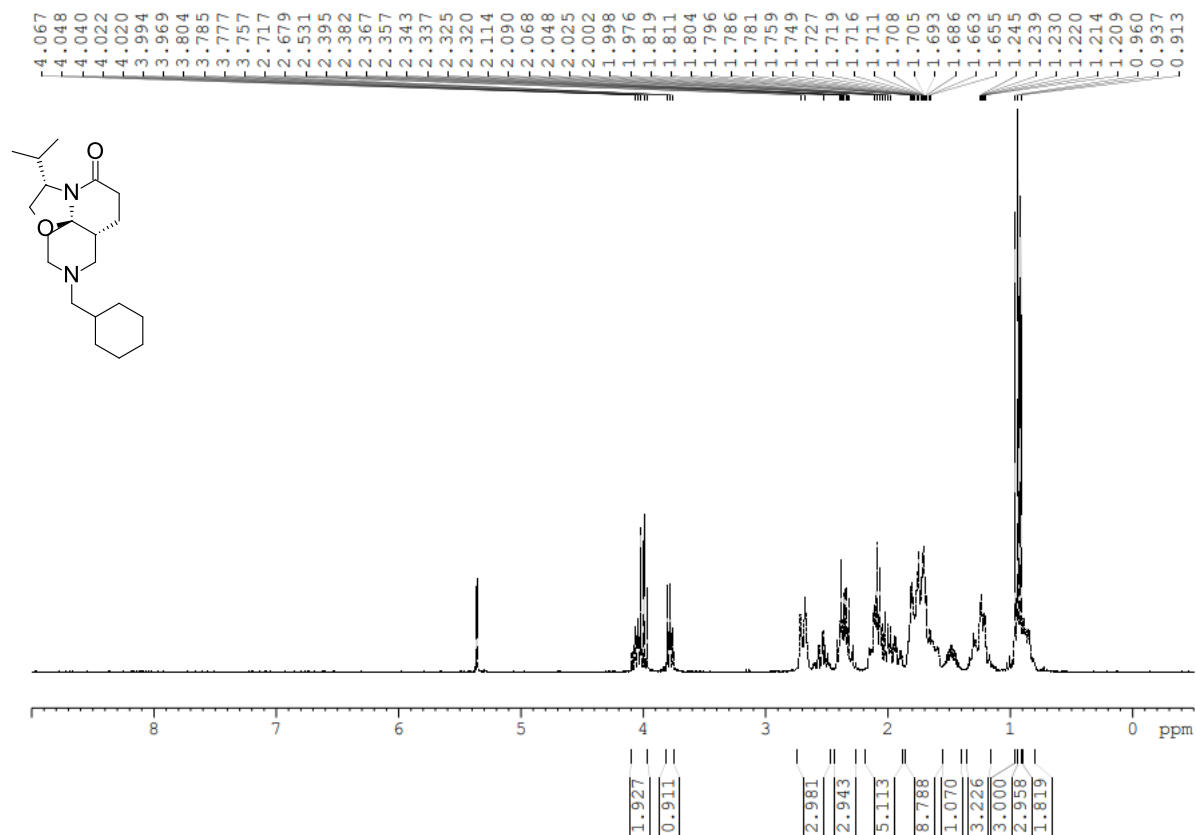

45,  $^{13}\text{C}$  NMR (75 MHz,  $\text{CD}_2\text{Cl}_2$ )

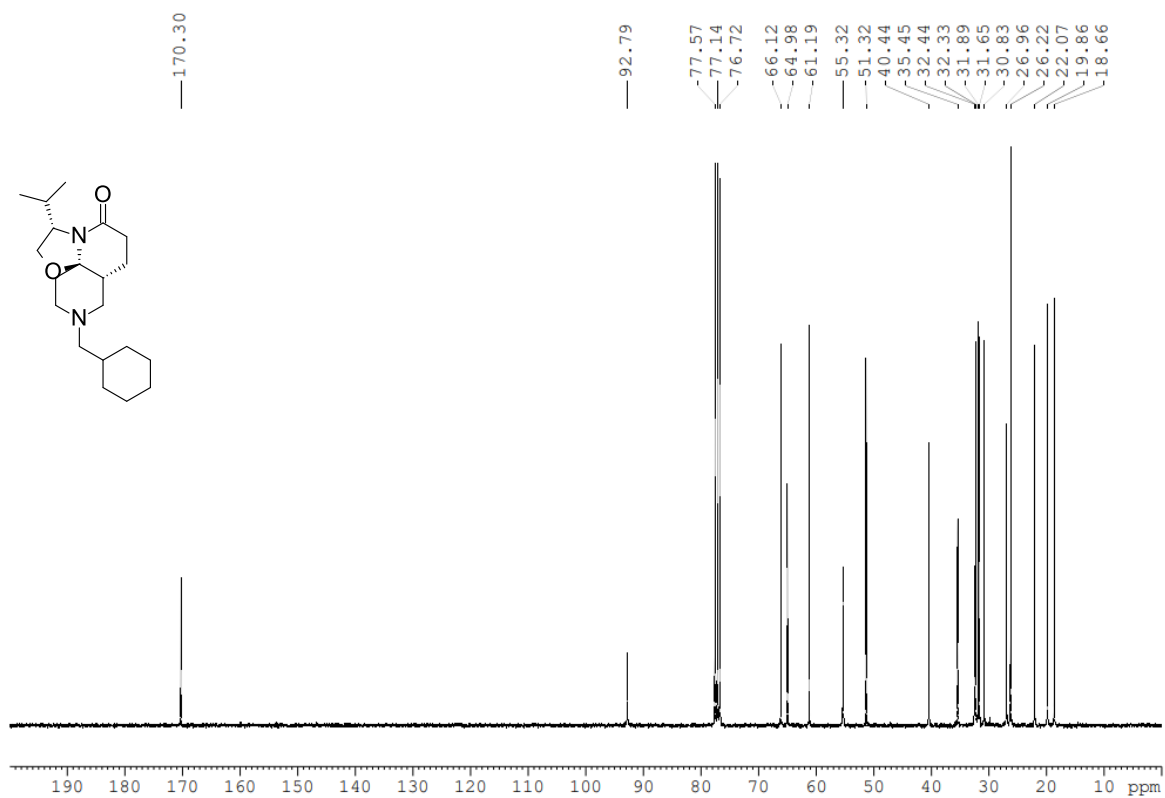

**46**,  $^1\text{H}$  NMR (300 MHz,  $\text{CDCl}_3$ )

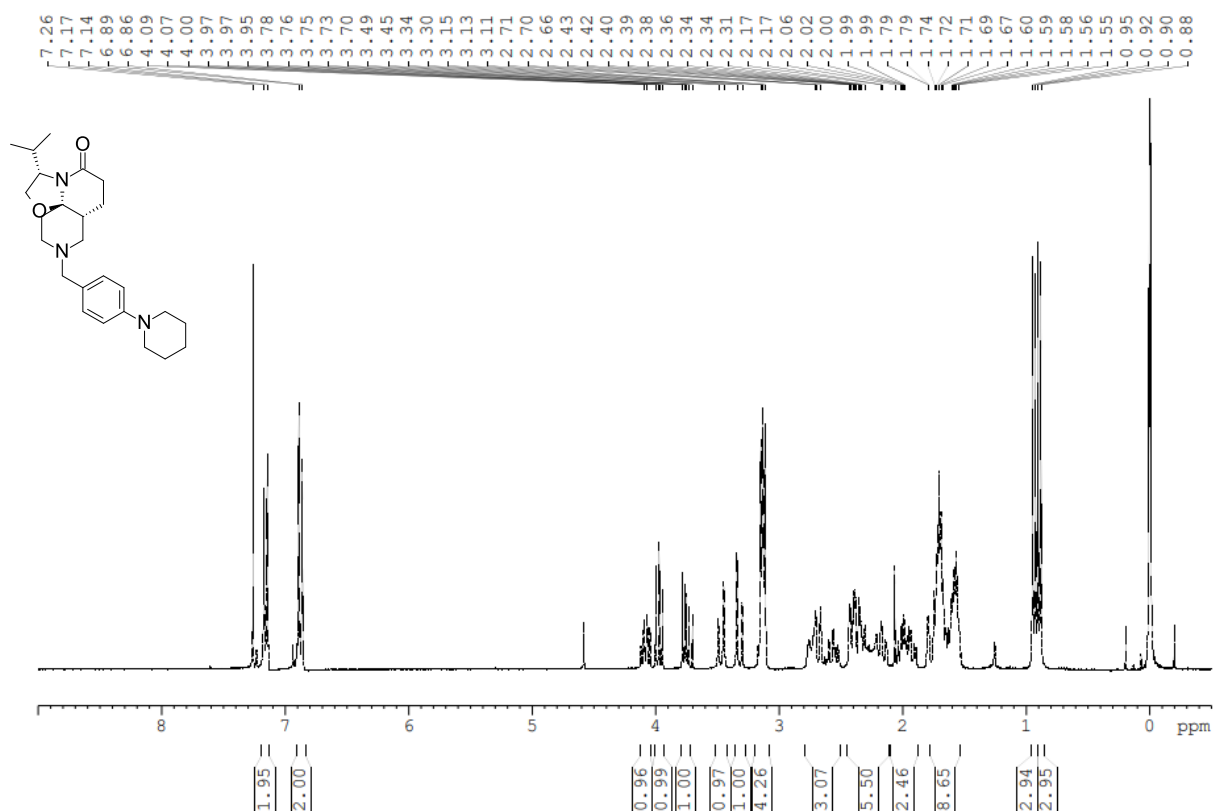

**46**,  $^{13}\text{C}$  NMR (75 MHz,  $\text{CDCl}_3$ )

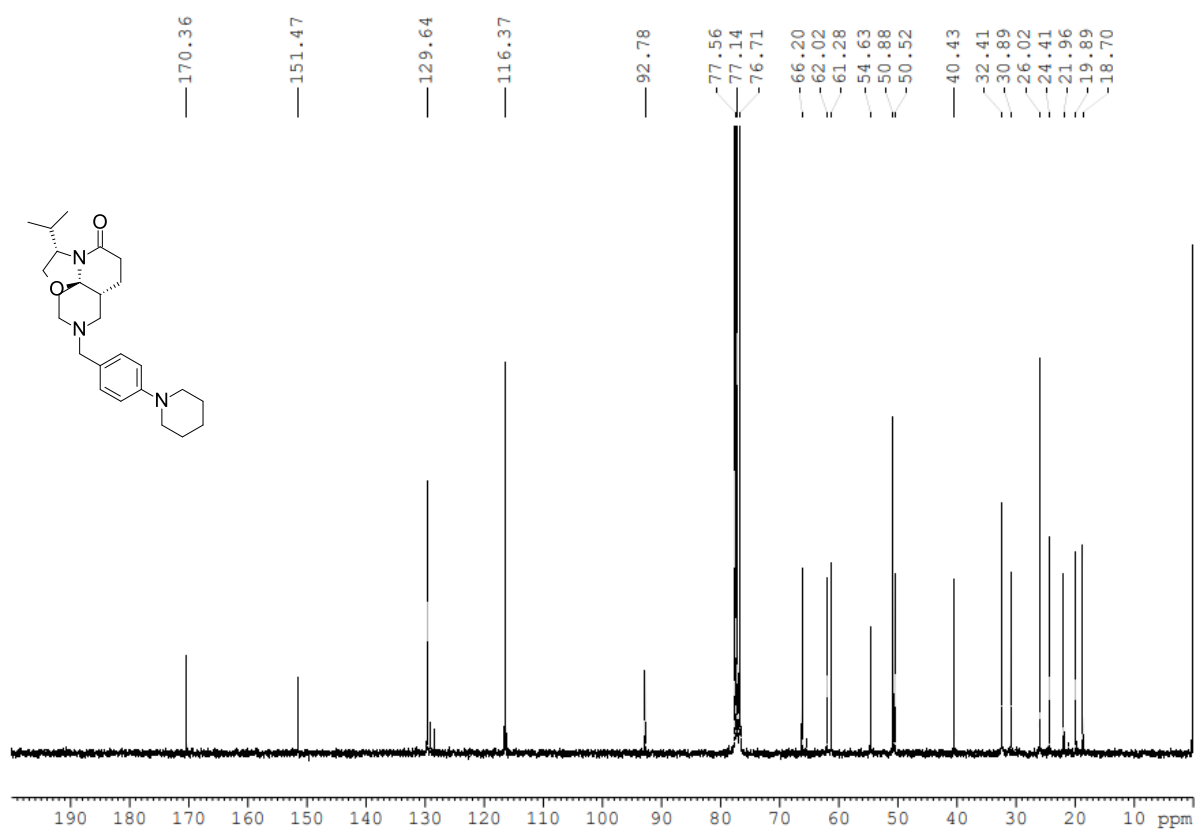

**47**,  $^1\text{H}$  NMR (300 MHz,  $\text{CDCl}_3$ )

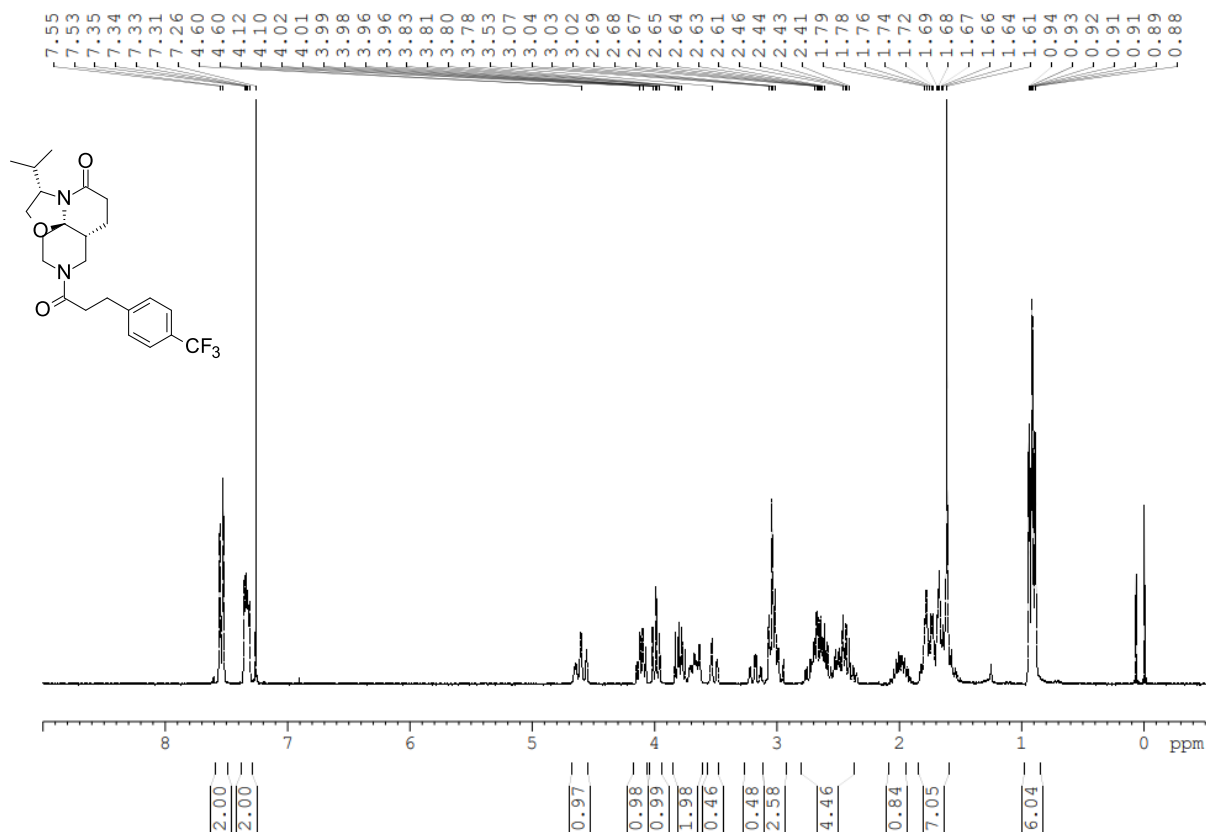

**47**,  $^{13}\text{C}$  NMR (75 MHz,  $\text{CDCl}_3$ )

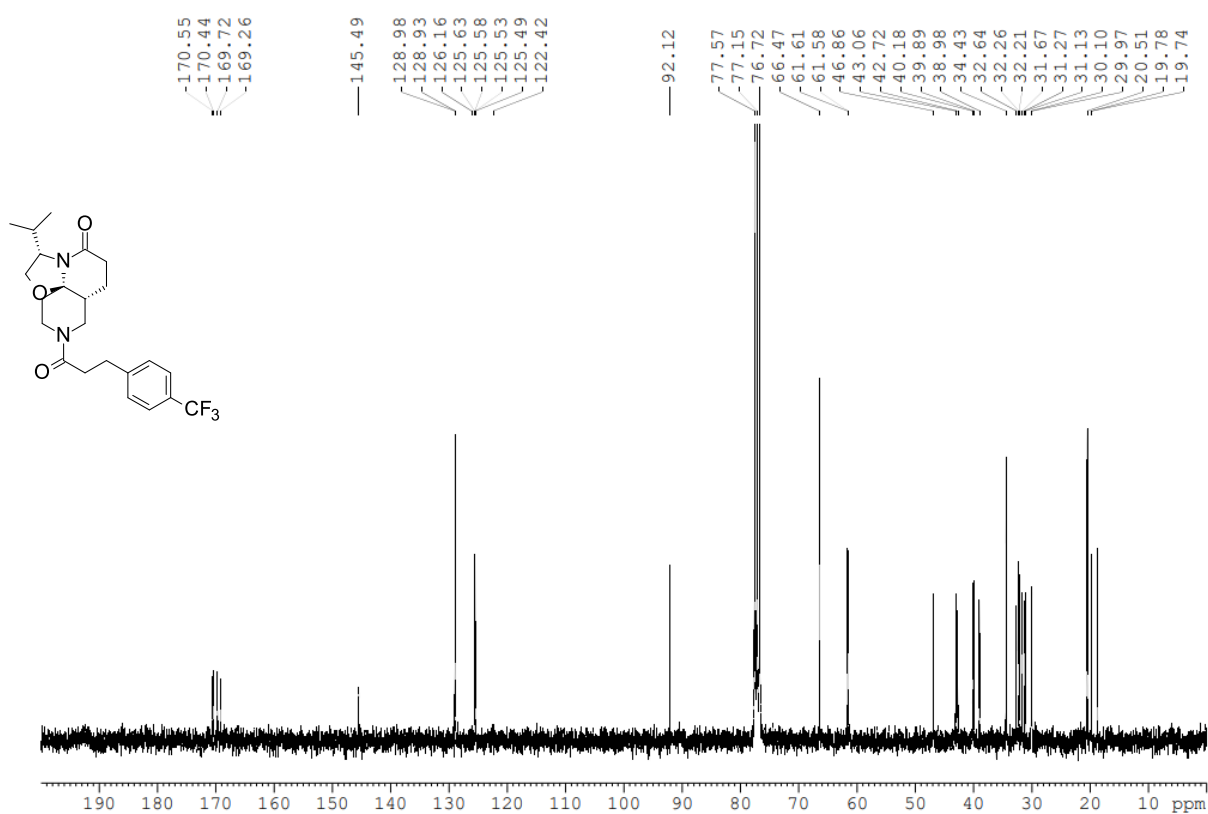

**48**,  $^1\text{H}$  NMR (300 MHz,  $\text{CDCl}_3$ )

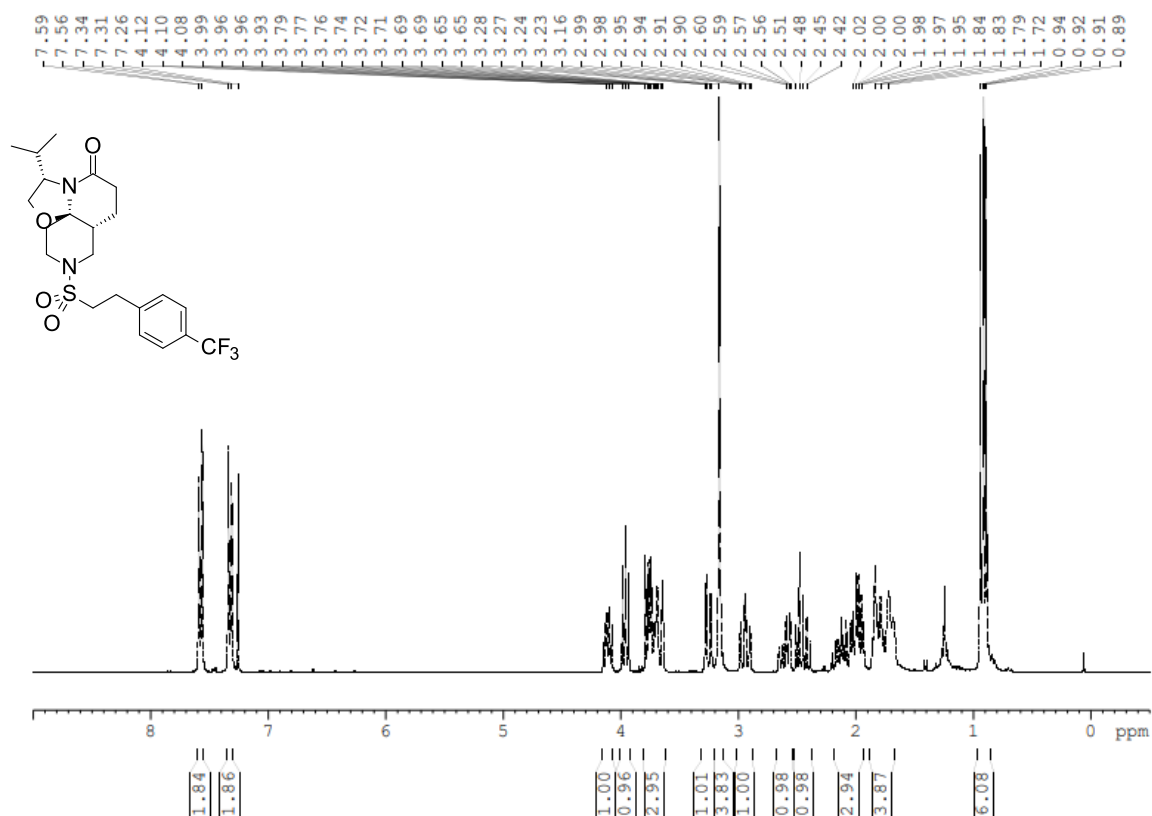

**48**,  $^{13}\text{C}$  NMR (75 MHz,  $\text{CDCl}_3$ )

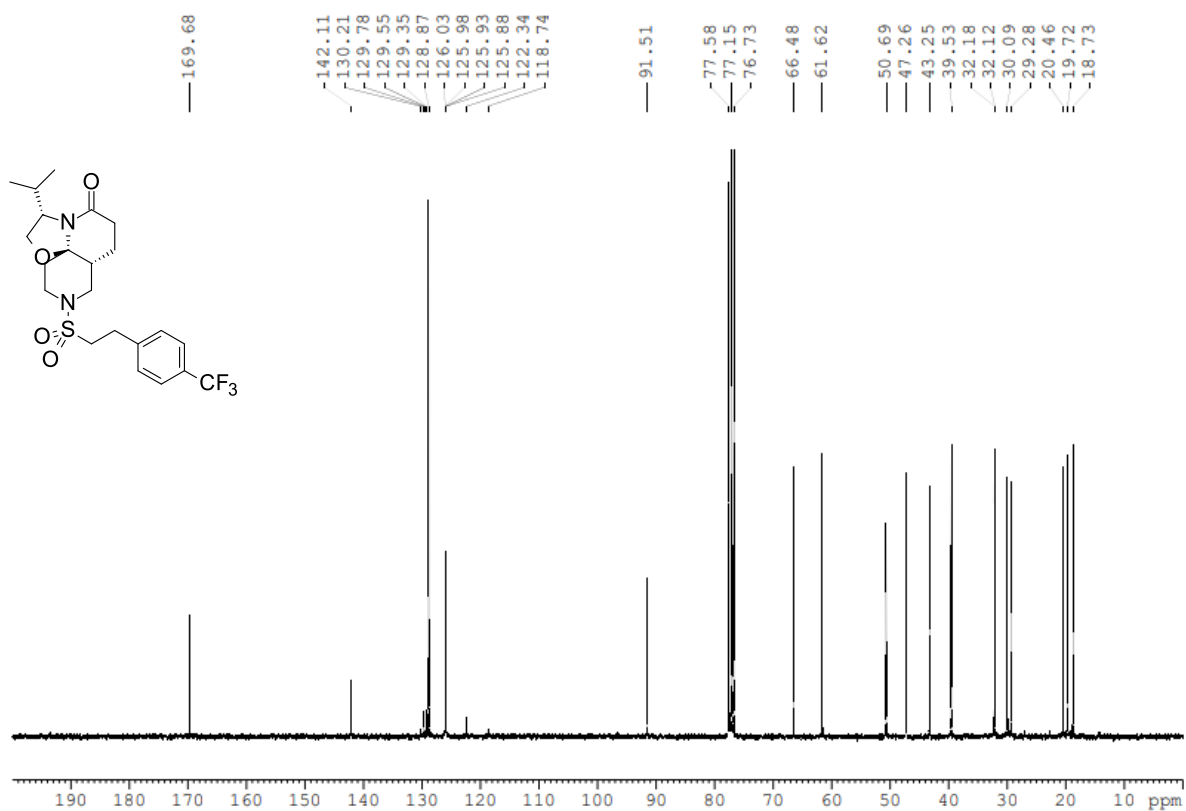

Supplement: s1 [file s1]
